# Supplementary material for: Development of 1,8-naphthalimide dyes for rapid imaging of subcellular compartments in plants
Source: Royal Society of Chemistry journal article supplement (doi:10.1039/d1cc05798g), 2021-12-07
Supplement: d1cc05798g1.pdf [file d1cc05798g1.pdf]

# Development of 1,8-Naphthalimide dyes for a rapid imaging of subcellular compartments in plants

Shuheï Kusano,\* Sakuya Nakamura, Masanori Izumi\* and Shinya Hagihara\*

*RIKEN Center for Sustainable Resource Science, 2-1 Hirosawa, Wako, Saitama 351-0198, Japan*

*\*shuheï.kusano@riken.jp*

*\*masanori.izumi@riken.jp*

*\*hagi@riken.jp*

## Supporting Information

### Table of Contents

|                                                                           |               |
|---------------------------------------------------------------------------|---------------|
| <b>I. General .....</b>                                                   | <b>S1</b>     |
| <b>II. Synthesis of naphthalimide-based probes 1 and 2.....</b>           | <b>S2</b>     |
| <b>III. Photophysical properties of 1 and 2 .....</b>                     | <b>S3-4</b>   |
| <b>IV. Imaging studies with laser scanning confocal microscopy .....</b>  | <b>S5-17</b>  |
| <b>V. Assessment of cell toxicity of naphthalimide-based probes .....</b> | <b>S18</b>    |
| <b>VI. Synthetic procedures for naphthalimide-based probes .....</b>      | <b>S19-30</b> |
| <b>VII. Reference .....</b>                                               | <b>S31</b>    |

## I. General

Commercially available reagents were obtained from Tokyo Kasei, Wako Pure Chemical Industries Ltd., KANTO CHEMICAL CO., INC. and Nacalai tesque, and used without further purification.

The  $^1\text{H}$  and  $^{13}\text{C}$  NMR were recorded on a Bruker 600 (600 MHz for  $^1\text{H}$ , 150 MHz for  $^{13}\text{C}$ ) spectrometer. Chemical shifts were reported in ppm ( $\delta$ ), and coupling constants were reported in Hz.  $^1\text{H}$  and  $^{13}\text{C}$ -resonances were referenced to solvent residual peaks for  $\text{CDCl}_3$  ( $^1\text{H}$ , 7.26 ppm),  $\text{DMSO-}d_6$  ( $^1\text{H}$ , 2.50 ppm),  $\text{CDCl}_3$  ( $^{13}\text{C}$ , 77.2 ppm) and  $\text{DMSO-}d_6$  ( $^{13}\text{C}$ , 39.5 ppm). Multiplicity and qualifier abbreviations are as follows: s = singlet, d = doublet, t = triplet, q = quartet, quin = quintet, m = multiplet, br = broad, doublet of doublets (dd), doublet of doublets of triplets (dd). Spectra were processed by Bruker Top-spin.

High resolution mass analyses (HRSM) were submitted to the Mass Spectrometry Laboratory at RIKEN. For crude analysis, ultra high-performance liquid chromatography-mass spectrometry (UPLC/MS) was performed on a SHIMADZU LCMS-2020 equipped with a reverse phase C18 column (2.7  $\mu\text{m}$  particle size, 2.1 x 100 mm) and a API/ESI mass spectrometry detector, and UV detector. UV-Vis spectra were recorded on a UV-1600. Fluorescent spectra were recorded on a RF-6000. Absolute quantum yields were determined using a SHIMADZU RF-6000 equipped with a calibrated integrating sphere system.

Thin-layer chromatography was performed on Merck 60 F254 precoated silica gel plates. Column chromatography was performed on silica gel (Silica Gel 60 N; 63–210 mesh, KANTO CHEMICAL CO., INC. or 40–50 mesh, KANTO CHEMICAL CO., INC.).

## II. Synthesis of naphthalimide-based probes 1 and 2

**Scheme S1.** Synthesis of naphthalimide-based probes 1 and 2

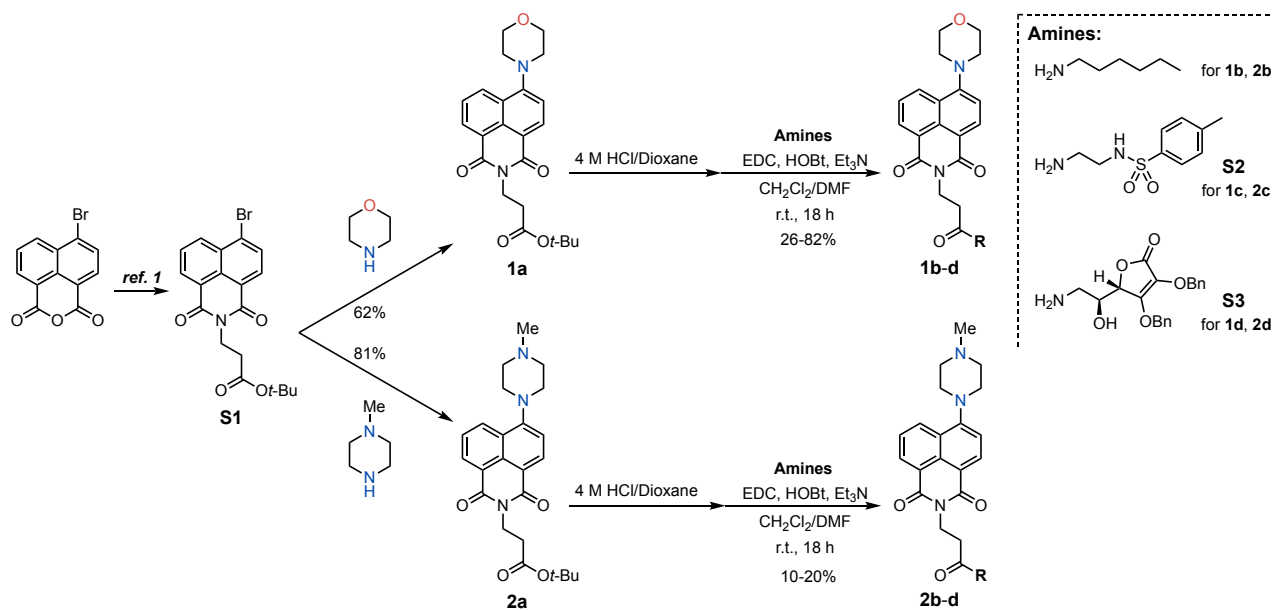

**Comments:** Probes **1** and **2** were synthesized from 4-bromo-1,8-naphthalic anhydride as a common starting material. After the acidic cleavage of the tertiary butyl group of **1a** and **2a**, the resulting product was used in subsequent steps without any purification.

**Scheme S2.** Synthesis of **1e** and **2e**

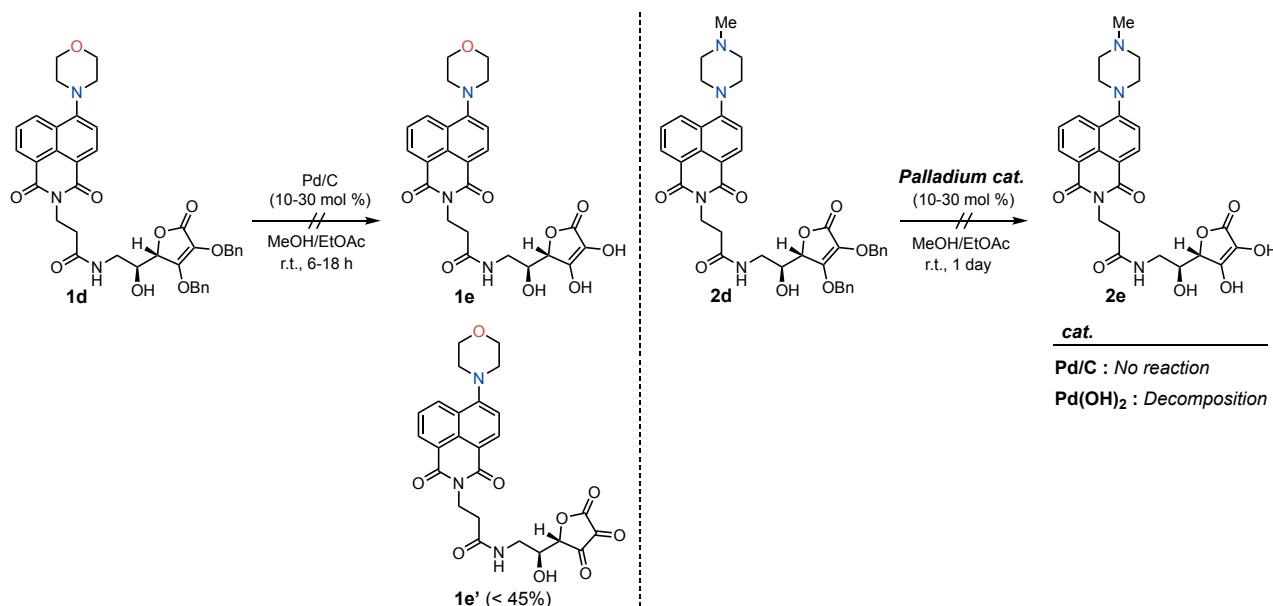

**Comments:** After the purification with reverse phase chromatography, the oxidized product **1e'** and unidentified product were provided. The chemical structure of **1e'** was determined from NMR and mass spectroscopy. Because the mass signal ( $m/z = 512$ , calculated for  $[\text{M} + \text{H}]^+$ ) corresponding to **1e** was observed in LC/MS analysis for the reaction mixture, we assumed that the oxidation of **1e** occurred during the purification.

### III. Photophysical properties of **1** and **2**

For spectroscopic measurements, the stock solutions of **1** and **2** were prepared as 5 mM solution in DMSO. All spectra were obtained with 1.0 cm square quartz cuvette. Both excitation and emission slit widths were of 5 nm, respectively. To determine the  $pK_a$  values of the Me-piperazine moiety on **2**, the fluorescence spectra were measured under various pH conditions. The  $pK_a$  values were calculated according to the Henderson-Hasselbach type equation;  $\log[(F_{\max} - F)/(F - F_{\min})] = pK_a - pH$ , where  $F$  represents fluorescence intensity.

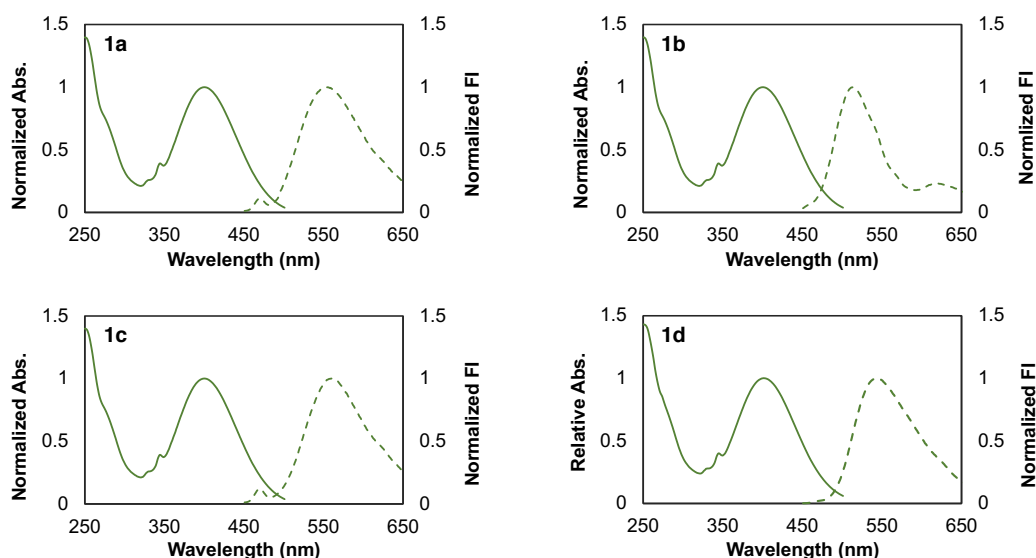

**Fig. S1.** Normalized absorption (solid line) and fluorescence spectra (dashed line) of **1** in phosphate buffer (20 mM, pH 7.2) containing 0.1% or 0.4% DMSO,  $\lambda_{\text{ex}} = 405$  nm, at 23 °C, [**1**] = 5 or 20  $\mu\text{M}$  for measuring fluorescent and absorption spectra, respectively. A precipitation was slightly observed for **1b** in this measuring condition.

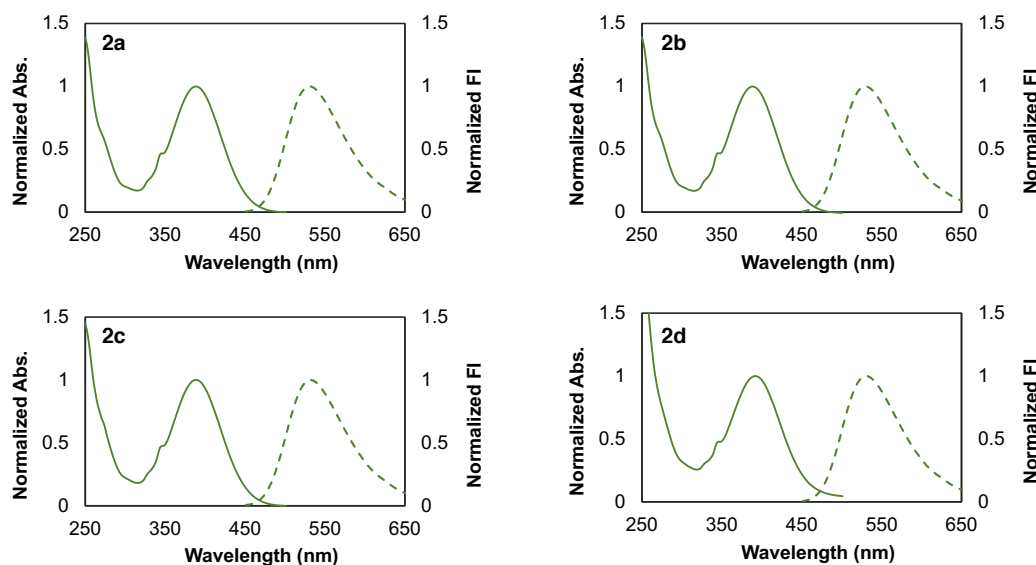

**Fig. S2.** Normalized absorption (solid line) and fluorescence spectra (dashed line) of **2** in phosphate buffer (20 mM, pH 5.7) containing 0.1% or 0.4% DMSO,  $\lambda_{\text{ex}} = 405$  nm, at 23 °C, [**2**] = 5 or 20  $\mu\text{M}$  for measuring fluorescent and absorption spectra, respectively.



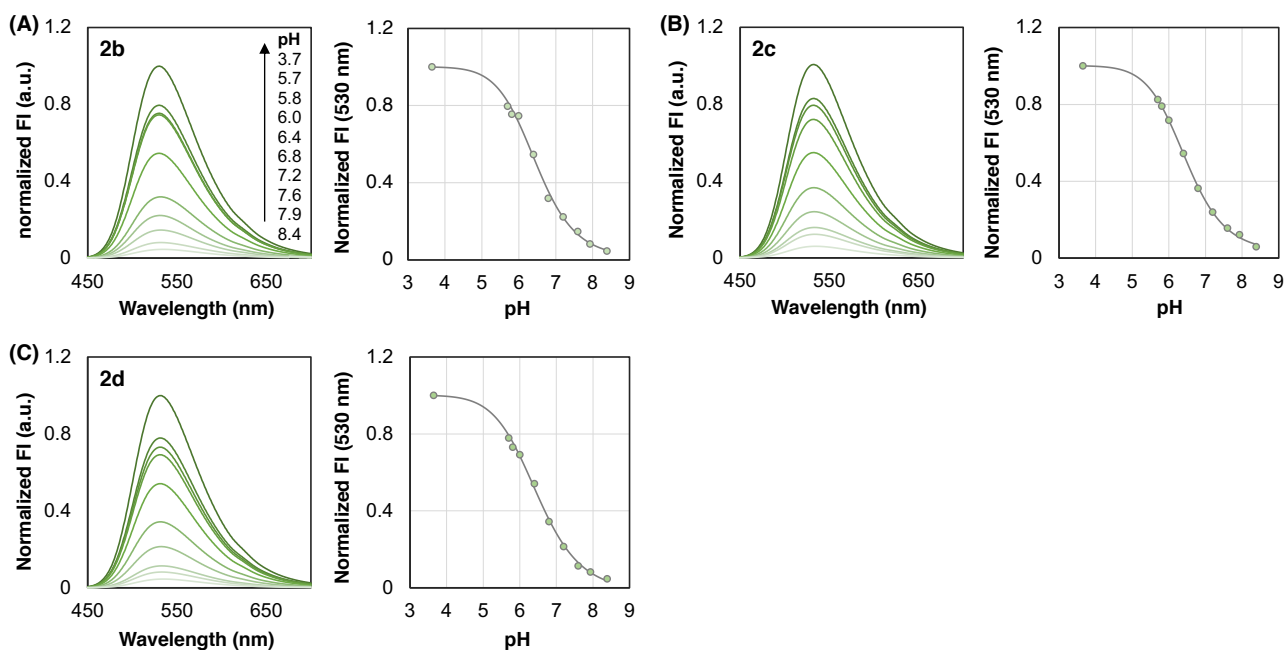

**Fig. S3.** Normalized fluorescence spectra of **2b-c** (5  $\mu$ M) at different pH conditions and the plots of normalized fluorescence intensity against pH. All measurements were performed in pH-controlled 20 mM phosphate buffer containing 0.1% DMSO,  $\lambda_{\text{Ex}}$  = 405 nm, at 23  $^{\circ}$ C.

**Table S1.** Quantum yields ( $\Phi$ ) of **2** in aqueous and organic solvents<sup>a)</sup>

|           | pH 7.2<br>Phosphate buffer | pH 5.7<br>Phosphate buffer | pH 3.7<br>Phosphate buffer | EtOH   | CH <sub>3</sub> CN | THF  | CH <sub>2</sub> Cl <sub>2</sub> |
|-----------|----------------------------|----------------------------|----------------------------|--------|--------------------|------|---------------------------------|
| <b>2a</b> | 0.11                       | 0.32                       | 0.41                       | < 0.01 | 0.02               | 0.02 | 0.03                            |
| <b>2b</b> | 0.1                        | 0.37                       | 0.44                       | < 0.01 | 0.02               | 0.02 | 0.04                            |
| <b>2c</b> | 0.1 <sup>b)</sup>          | 0.3                        | 0.41                       | < 0.01 | 0.01               | 0.02 | 0.03                            |
| <b>2d</b> | 0.09 <sup>b)</sup>         | 0.27                       | 0.35                       | < 0.01 | 0.01               | 0.02 | 0.04                            |

a) Containing 0.1% DMSO in each solvent. b) In this measuring condition, small quantity of precipitation was observed.

#### IV. Imaging studies with confocal laser scanning microscopy (CLSM)

*Arabidopsis* (*Arabidopsis thaliana*) plants ecotype Columbia were used for live-cell imaging analysis of the naphthalimide probes. The plants were grown in soil in chamber at 23°C under a 14-h-light/10-h-dark photoperiod using LED lamps ( $140 \mu\text{mol m}^{-2} \text{s}^{-1}$ ). Second or third rosette leaves of 14- to 21-d-old plants were used for the imaging via a CLSM system (LSM 900 system; Carl Zeiss) equipped with a 40x objective lens (C-Apochromat 40x/1.20 W Korr; Carl Zeiss). 10 mM MES-NaOH (pH 5.5) buffer containing 10  $\mu\text{M}$  probes (**1** and **2**) were prepared and directly infiltrated into the excised leaves from its abaxial surface via a 1-ml syringe, followed by the observation by the confocal microscopy. The emissions between 410–546 nm for the naphthalimide probes and 650–700 nm for chlorophyll autofluorescence were detected simultaneously following the excitation by 405- and 640-nm diode lasers. For the fluorescence detection of red fluorescent protein (RFP) variants, the emission between 570–650 nm was detected following the excitation by 561-nm diode laser. Each detection was switched every line scan during the colocalization assay between the probes and RFP variants.

High light treatment was performed as previously described.<sup>1</sup> Plants were exposed to strong visible light ( $2,000 \mu\text{mol m}^{-2} \text{s}^{-1}$ ) for 2 h at 23°C, and then cultivated in the indicated growth conditions for 2 d, followed by microscopic observations. 10 mM MES-NaOH (pH 5.5) buffer containing 20  $\mu\text{M}$  **1a** or 10  $\mu\text{M}$  **2a** was infiltrated into the leaves before the observations. The light was provided by a Xenon light source (MAX-303; Asahi Spectra) equipped with a mirror module (MAX-VIS; Asahi Spectra) and a rod lens (RLQL80-1; Asahi Spectra) to emit visible light (wavelength between 385 and 740 nm) with uniform intensity. The light intensity was measured with a data logger (LI-250A; LI-COR) equipped with a photosynthetic photon flux density sensor (LI-190R; LI-COR).

For colocalization assay between the probes and fluorescent protein markers visualizing intracellular components, we generated transgenic *Arabidopsis* plants expressing RFPs targeted to cytoplasm, vacuolar membrane, chloroplast outer envelope, endoplasmic reticulum (ER), respectively, as follows.

For the visualization of cytoplasm, we generated the plants expressing monomeric red fluorescent protein (mRFP) fused to nuclear export signal (NES; mRFP-NES). mRFP fragment was amplified by PCR using the primers mRFP\_F and NES-mRFP\_R (Table S2). The reverse primer contains NES from protein kinase inhibitor (PKI)<sup>2</sup> encoding the amino acids peptides ELALKLAGLDIN. The amplicon was cloned into the vector pENTR1A (Invitrogen) in a SLiCE (Seamless Ligation Cloning Extract) reaction<sup>3</sup>, and then transferred to the vector pUB-Dest<sup>4</sup> in a LR clonase II (Invitrogen) reaction. For vacuolar membrane-marker expressing plants, the coding sequence of delta tonoplast intrinsic protein ( $\delta\text{TIP}$ ; At3g16240) was amplified from *Arabidopsis* cDNA by PCR using the primers  $\delta\text{TIP}_\text{F}$  and  $\delta\text{TIP}_\text{R}$  (Table S2), cloned into pENTR/D-TOPO (Invitrogen), and transferred to the vector pUBC-mRFP-Dest<sup>4</sup> in a LR clonase II reaction.

For chloroplast outer envelope marker, the genomic fragment comprising 860-bp upstream from the start codon to the region just before the stop codon of Translocon at the outer membrane of chloroplasts 64-III (TOC64-III; AT3G17970) was amplified from *Arabidopsis* genomic DNA by PCR using the primers TOC64-III\_F and TOC64-III\_R (Table S2), cloned into the pDONR P4-P1r (Invitrogen) in a BP clonase II reaction. The coding sequence of an RFP derivative mRuby3<sup>5</sup> was amplified by PCR using the primers mRuby\_F and mRuby\_R (Table S2), and cloned into the pDONR221. The two fragments were then inserted into the vector

R4pGWB501<sup>6</sup> in a LR clonase II plus (Invitrogen) reaction. For the visualization of ER, the cDNA fragment comprising C-terminal transmembrane domain (TMD) of CYTOCHROME B5 ISOFORM B (CB5-B; At2g32720)<sup>7</sup> was amplified from the Arabidopsis cDNA by PCR using the primers CB5 TMD\_F and CB5 TMD\_R (Table S2), cloned into pENTR1A, and then transferred to the vector pUBN-mRFP-Dest<sup>4</sup>.

The resulting vectors were introduced into *Agrobacterium* (*Agrobacterium tumefaciens*) strain GV3101 and then introduced into Arabidopsis ecotype Columbia by the floral dip method<sup>8</sup>. In the generated transgenic plants, each construct visualizes the target compartment (Fig. S4), respectively.

For the imaging of the model green algae *Chlamydomonas reinhardtii*, the wild-type strain CC-124 were used. The cells were grown in liquid Tris-acetate-phosphate (TAP) solution<sup>9</sup> in a rotation incubator at 23°C under continuous light (10  $\mu\text{mol m}^{-2} \text{s}^{-1}$ ). Cells in stationary phase were diluted to a density of  $0.5 \times 10^6$  cells  $\text{mL}^{-1}$  in new TAP solution, then cultured for 4 d, and then harvested by centrifugation at 600 g for 3 min and resuspended in fresh TAP solution containing 50  $\mu\text{M}$  **2a** probes. After the incubation for 5 minutes, the cells were observed via CLSM system (LSM 900 system; Carl Zeiss) equipped with a 63x objective lens (Plan-Apochromat 63x/1.40 Oil DIC M27; Carl Zeiss).

**Table S2.** The sequences of primers for gene cloning

| Primer name    | Primer sequence (5' to 3')                                                     | Amplicon size (bp) |
|----------------|--------------------------------------------------------------------------------|--------------------|
| mRFP_F         | AGGAACCAATTCAGTCGACATGGCCTCCTCCGAGGACG                                         | 714                |
| mRFP-NES_R     | AAAGCTGGGTCTAGATATCTTAGTTAATATCAAGTCCAGCCAACCTTAAGAGCAAGCTCGGCGCCGGTGGAGTGGCGG |                    |
| $\delta$ TIP_F | CACCATGGCTGGAGTTGCCTTTG                                                        | 753                |
| $\delta$ TIP_R | GAAATCAGCAGAAGCAAGAG                                                           |                    |
| TOC64-III_F    | GGGGACAACCTTTGTATAGAAAAGTTGATACGTCGGTTCATGTGTG                                 | 4622               |
| TOC64-III_R    | GGGGACTGCTTTTTGTACAAACTTGCCCTGGAATTTCTCAGTCTC                                  |                    |
| mRuby_F        | GGGGACAAGTTTGTACAAAAAGCAGGCTTCATGGTTTCAAAGGGCGAGG                              | 681                |
| mRuby_R        | GGGGACCACTTTGTACAAGAAAGCTGGGTTCACCTATATAAATCATC                                |                    |
| CB5 TMD_F      | AGGAACCAATTCAGTCGACTTCATAATCAAGCTCCTC                                          | 87                 |
| CB5 TMD_R      | AAAGCTGGGTCTAGATATCCTACCCTGATTTGGTGTAG                                         |                    |

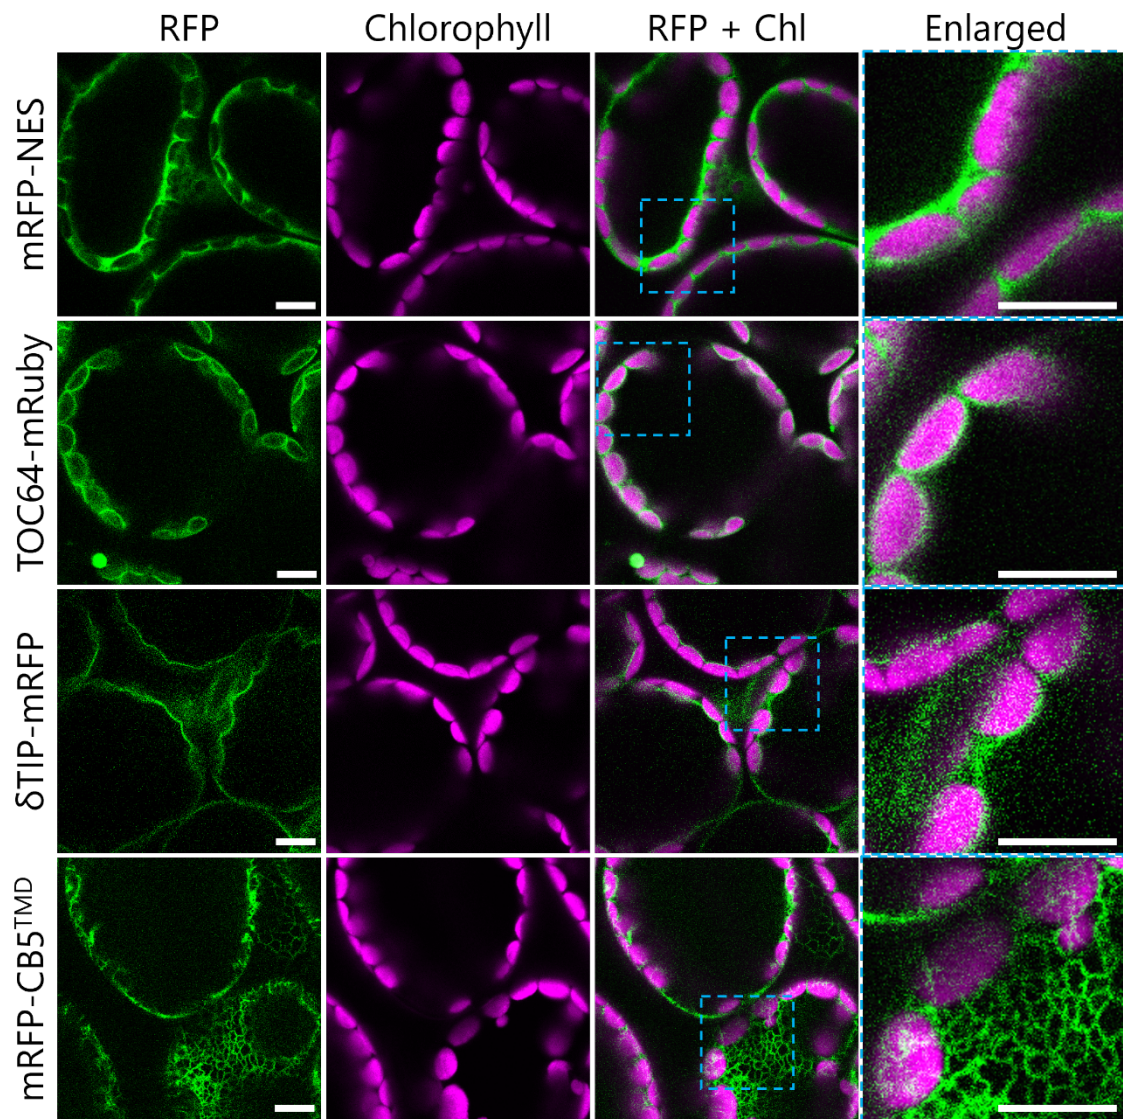

**Fig. S4.** Confocal images of mesophyll cells expressing red fluorescent proteins (RFPs) that are targeted to the cytoplasm (mRFP-NES), chloroplast outer envelope (TOC64-mRuby), the vacuolar membrane ( $\delta$ TIP-mRFP) or ER (mRFP-CB5<sup>TMD</sup>) from leaves of transgenic plants expressing respective markers. Green, RFP fluorescence; magenta, chlorophyll autofluorescence (Chl). Scale Bars = 10  $\mu$ m.



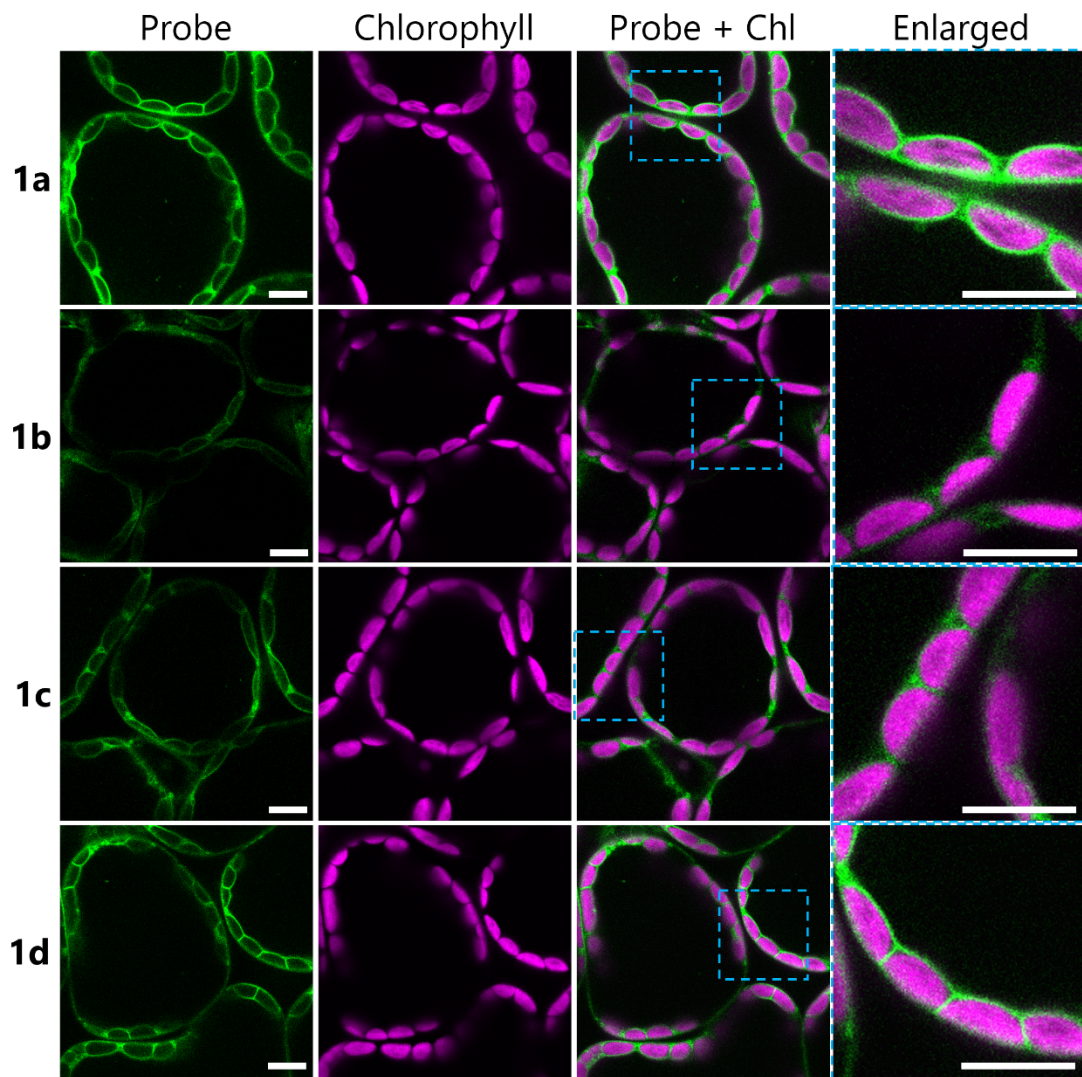

**Fig. S5.** Confocal images of mesophyll cells from wild-type leaves stained with naphthalimide-based probes **1a–d**. Green, probe fluorescence; magenta, chlorophyll autofluorescence (Chl). Scale Bars = 10  $\mu$ m.

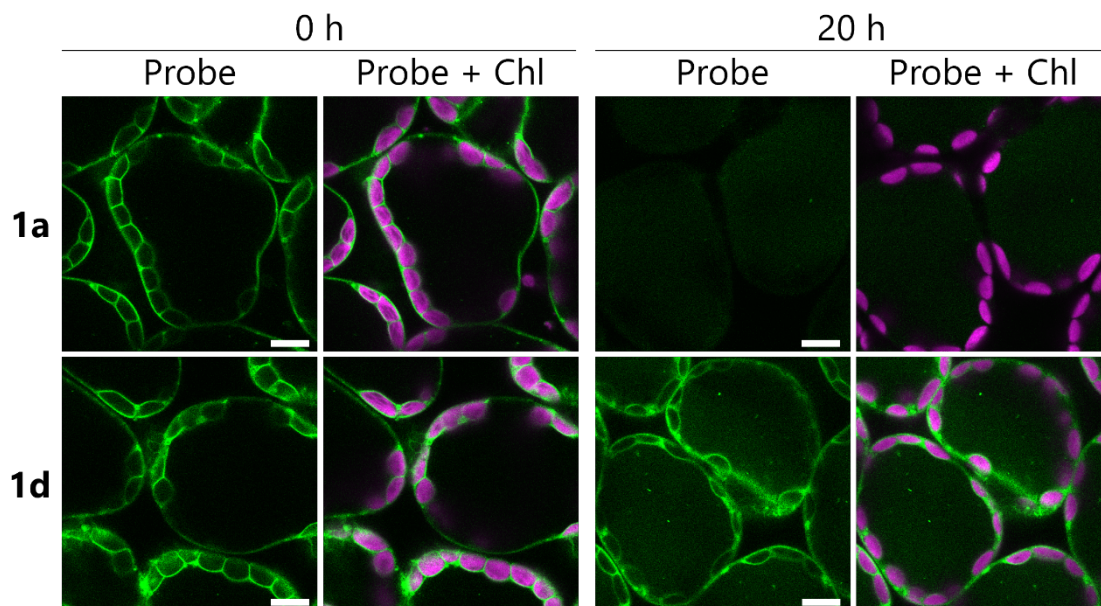

**Fig. S6.** Confocal images of mesophyll cells from wild-type leaves stained with naphthalimide-based probes **1a** and **1d**. Green, probe fluorescence; magenta, chlorophyll autofluorescence (Chl). Scale Bars = 10  $\mu$ m.

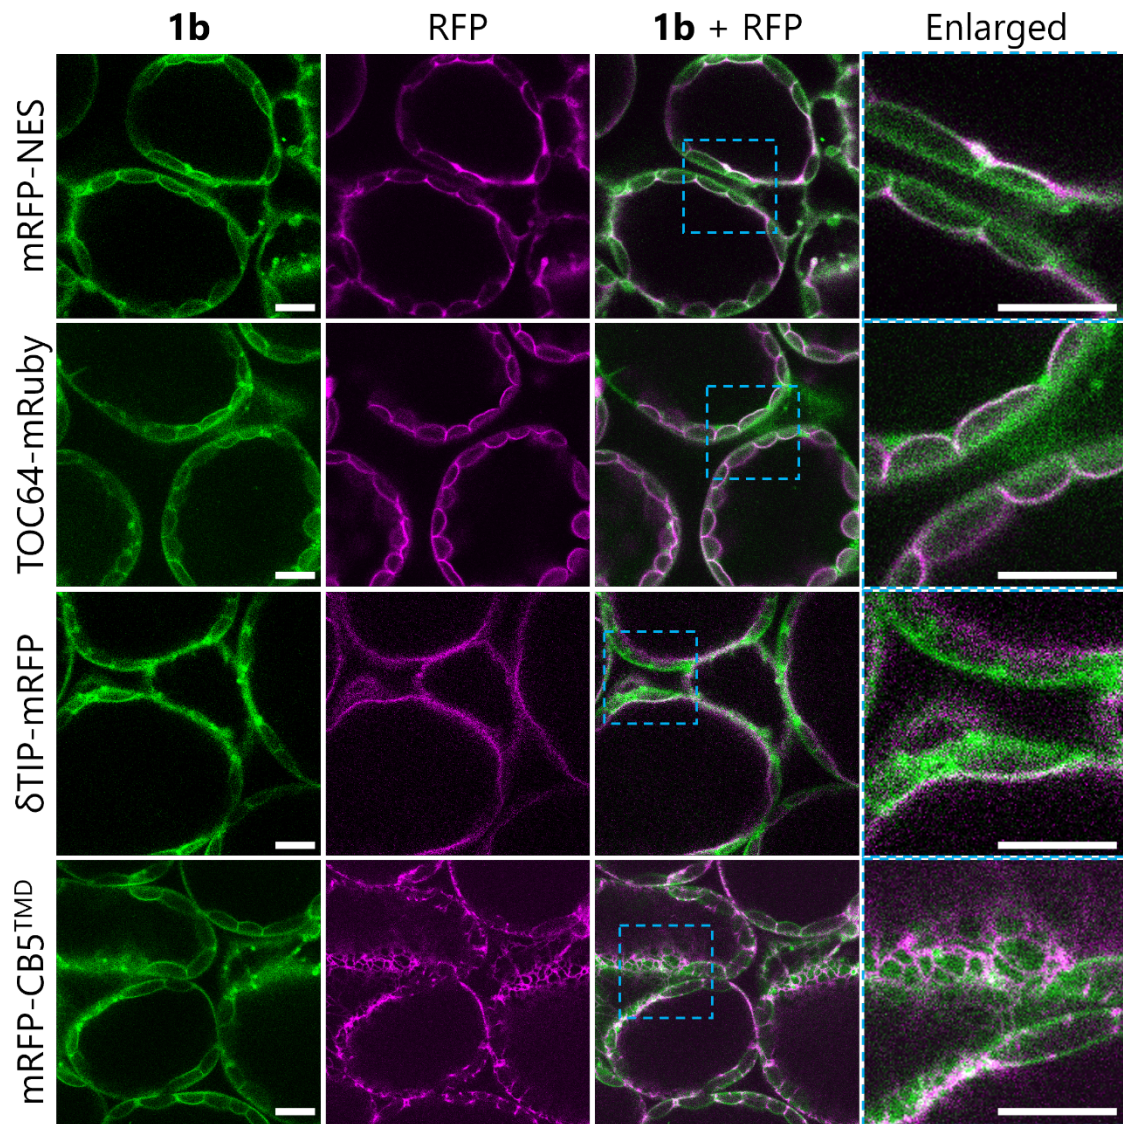

**Fig. S7.** Confocal images of mesophyll cells expressing red fluorescent proteins (RFPs) that are targeted to the cytoplasm (mRFP-NES), chloroplast outer envelope (TOC64-mRuby), the vacuolar membrane ( $\delta$ TIP-mRFP) or ER (mRFP-CB5<sup>TMD</sup>) from leaves stained with the probe **1b**. Green, probe fluorescence; magenta, RFP fluorescence. Scale Bars = 10  $\mu$ m.



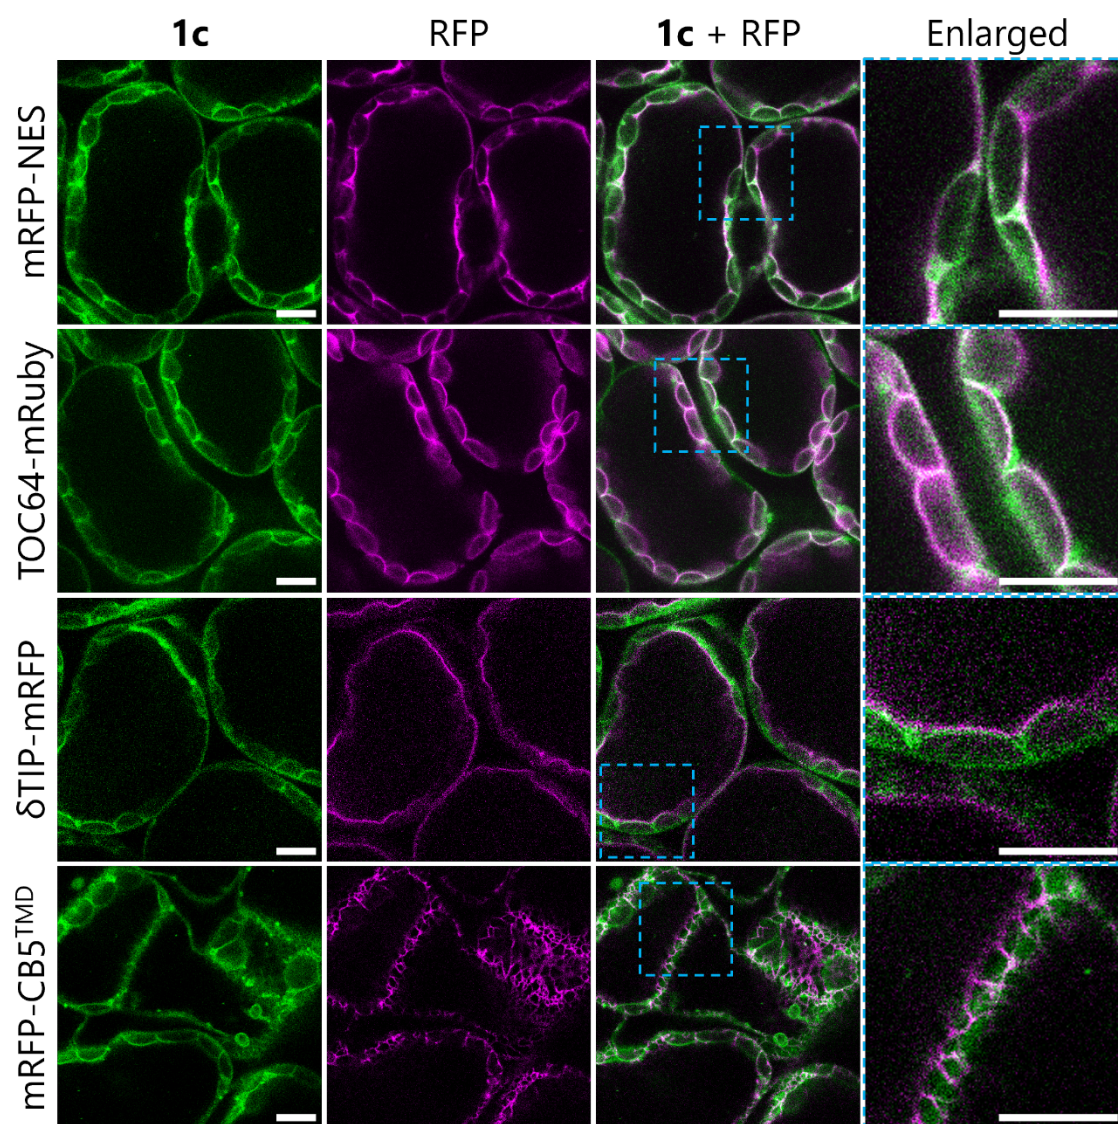

**Fig. S8.** Confocal images of mesophyll cells expressing red fluorescent proteins (RFPs) that are targeted to the cytoplasm (mRFP-NES), chloroplast outer envelope (TOC64-mRuby), the vacuolar membrane ( $\delta$ TIP-mRFP) or ER (mRFP-CB5<sup>TMD</sup>) from leaves stained with the probe **1c**. Green, probe fluorescence; magenta, RFP fluorescence. Scale Bars = 10  $\mu$ m.

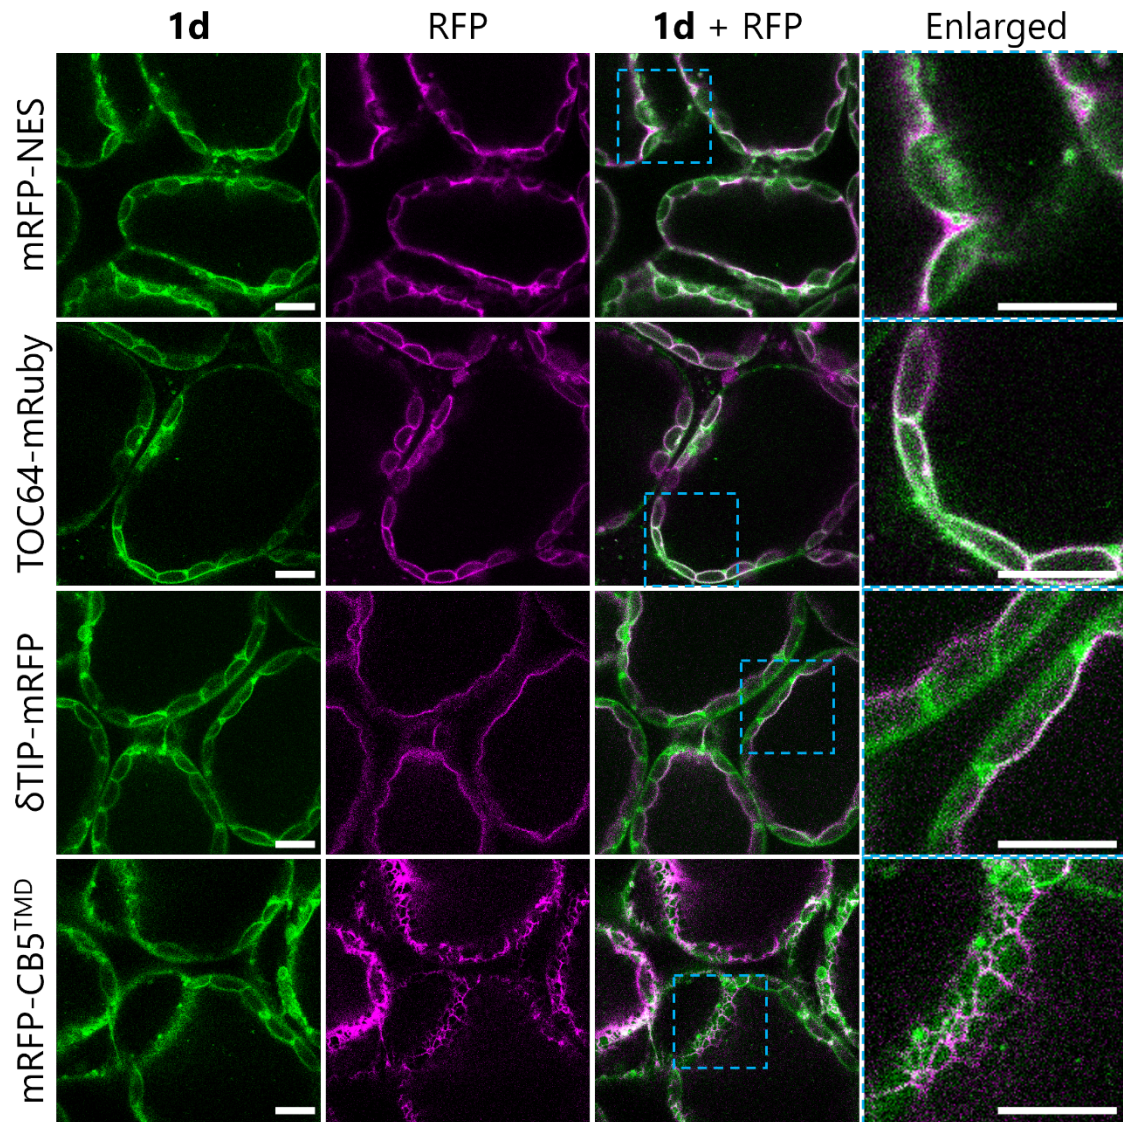

**Fig. S9.** Confocal images of mesophyll cells expressing red fluorescent proteins (RFPs) that are targeted to the cytoplasm (mRFP-NES), chloroplast outer envelope (TOC64-mRuby), the vacuolar membrane ( $\delta$ TIP-mRFP) or ER (mRFP-CB5<sup>TMD</sup>) from leaves stained with the probe **1d**. Green, probe fluorescence; magenta, RFP fluorescence. Scale Bars = 10  $\mu$ m.



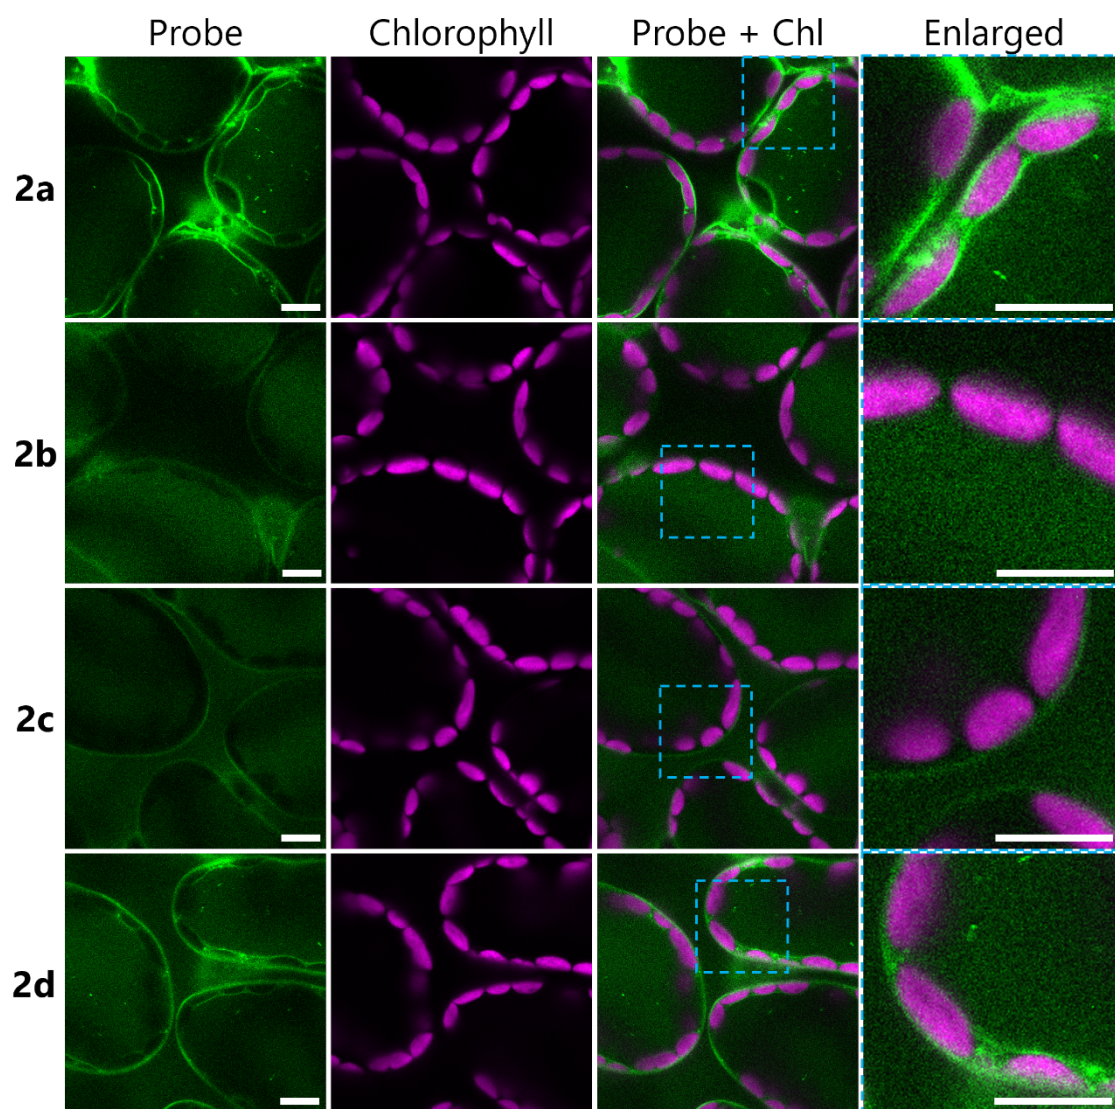

**Fig. S10.** Confocal images of mesophyll cells from wild-type leaves stained with naphthalimide-based probes **2a–d**. Green, probe fluorescence; magenta, chlorophyll autofluorescence (Chl). Scale Bars = 10  $\mu$ m.

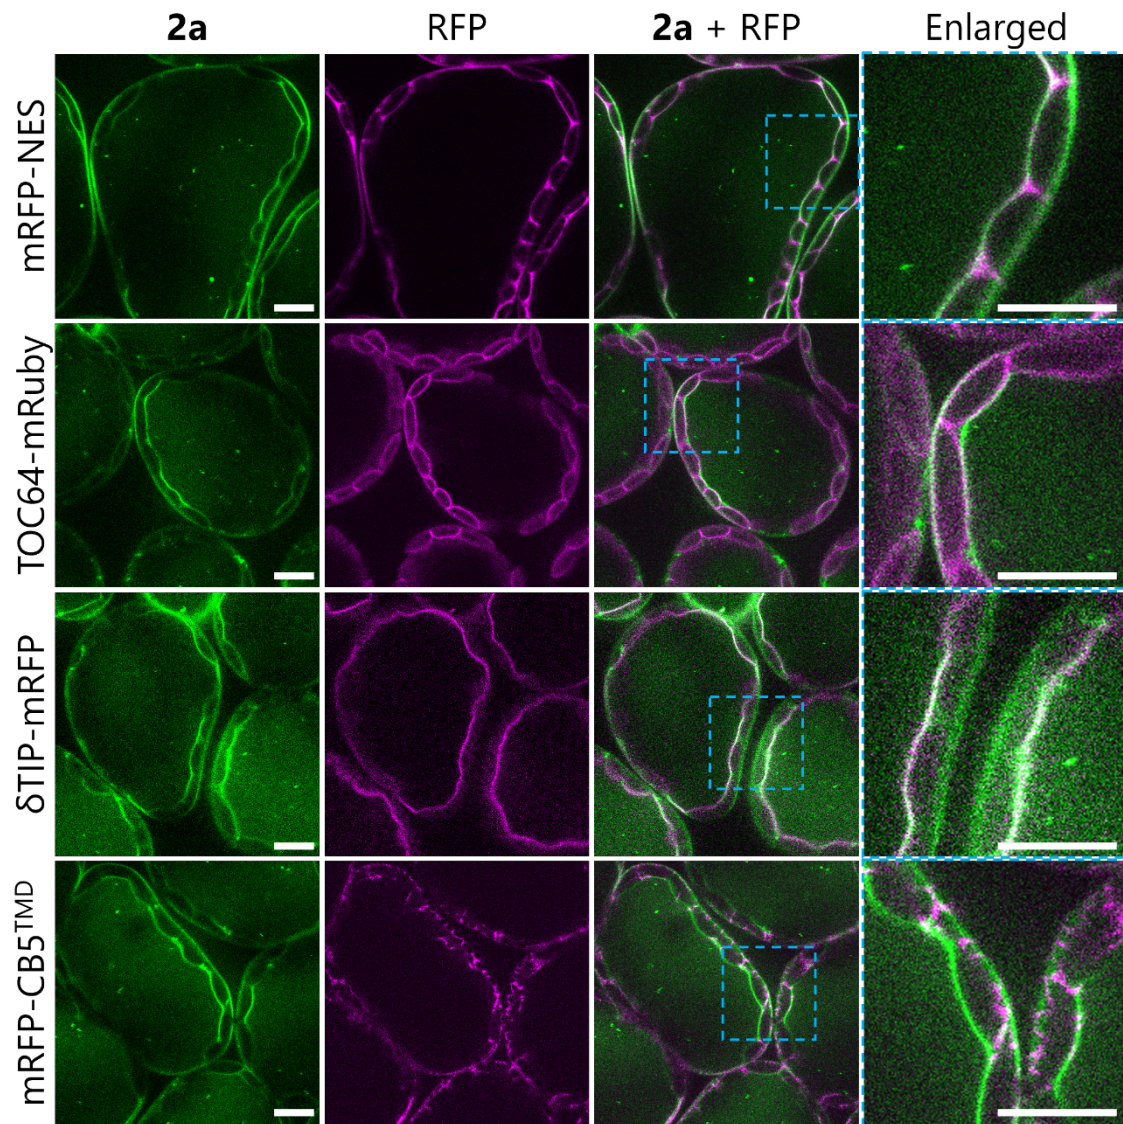

**Fig. S11.** Confocal images of mesophyll cells expressing red fluorescent proteins (RFPs) that are targeted to the cytoplasm (mRFP-NES), chloroplast outer envelope (TOC64-mRuby), the vacuolar membrane ( $\delta$ TIP-mRFP) or ER (mRFP-CB5<sup>TMD</sup>) from leaves stained with the probe **2a**. Green, probe fluorescence; magenta, RFP fluorescence. Scale Bars = 10  $\mu$ m.



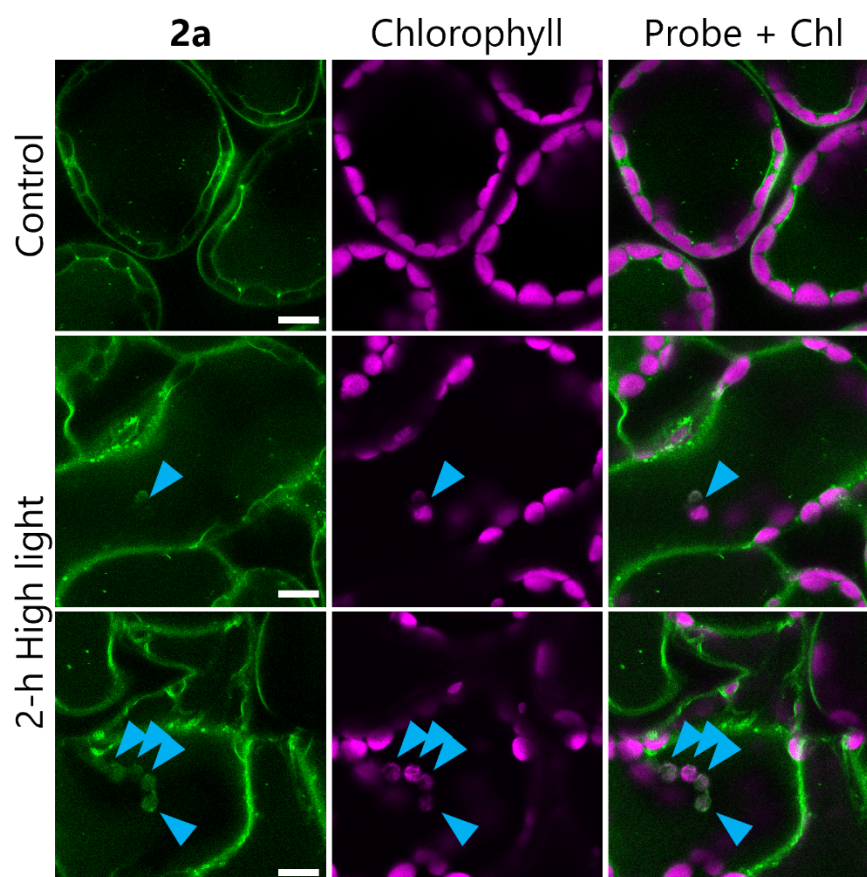

**Fig. S12.** Confocal images of mesophyll cells stained with the naphthalimide-based probe **2a** from non-treated control leaves or leaves 2 d after a high light treatment ( $2,000 \mu\text{mol m}^{-2} \text{s}^{-1}$ ) for 2 h. Closed arrowheads indicate vacuole-enclosed chloroplasts. Green, probe fluorescence; magenta, chlorophyll autofluorescence (Chl). Scale Bars = 10  $\mu\text{m}$ .

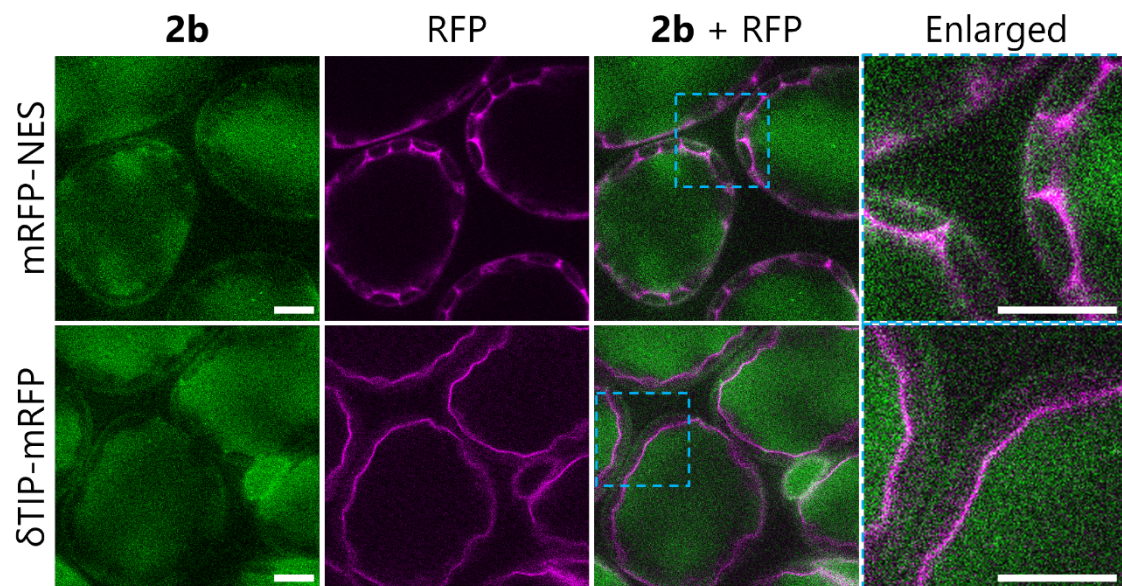

**Fig. S13.** Confocal images of mesophyll cells expressing red fluorescent proteins (RFPs) that are targeted to the cytoplasm (mRFP-NES) or the vacuolar membrane ( $\delta$ TIP-mRFP) from leaves stained with the probe **2b**. Green, probe fluorescence; magenta, RFP fluorescence. Scale Bars = 10  $\mu$ m.

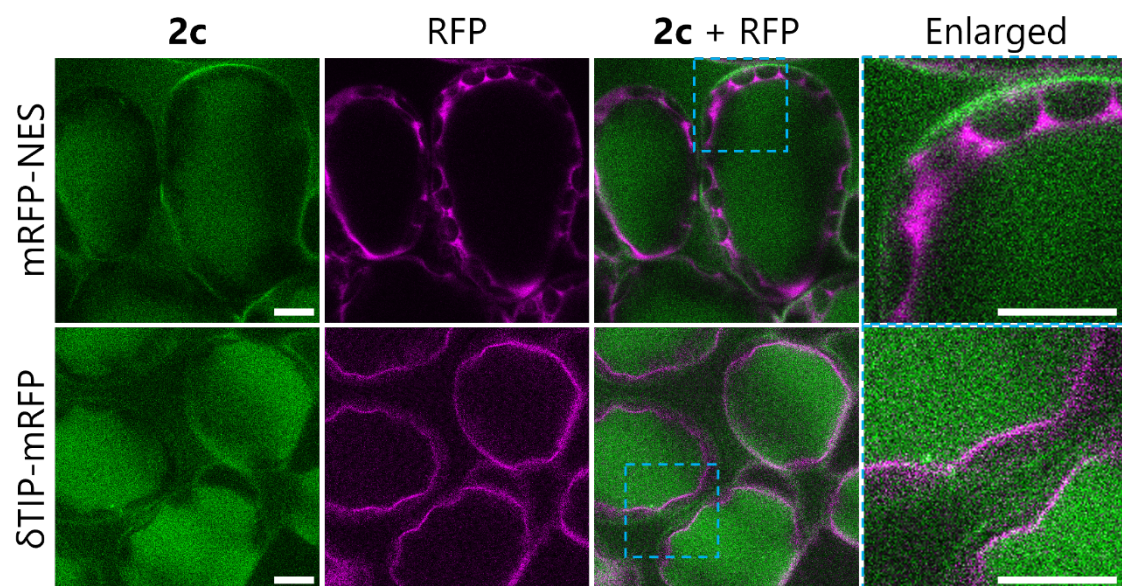

**Fig. S14.** Confocal images of mesophyll cells expressing red fluorescent proteins (RFPs) that are targeted to the cytoplasm (mRFP-NES) or the vacuolar membrane ( $\delta$ TIP-mRFP) from leaves stained with the probe **2c**. Green, probe fluorescence; magenta, RFP fluorescence. Scale Bars = 10  $\mu$ m.



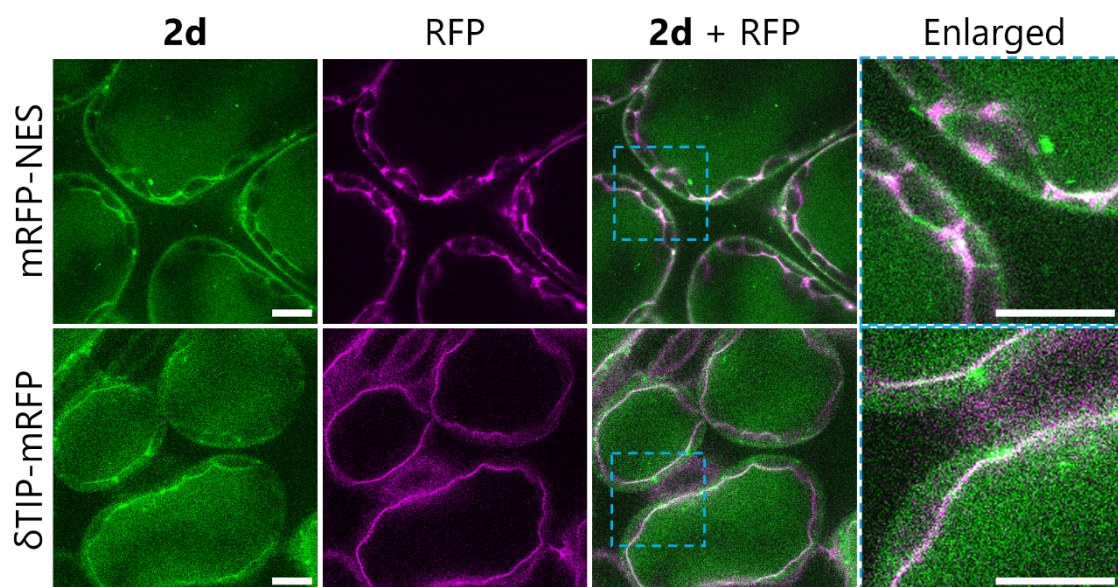

**Fig. S15.** Confocal images of mesophyll cells expressing red fluorescent proteins (RFPs) that are targeted to the cytoplasm (mRFP-NES) or the vacuolar membrane ( $\delta$ TIP-mRFP) from leaves stained with the probe **2d**. Green, probe fluorescence; magenta, RFP fluorescence. Scale Bars = 10  $\mu$ m.

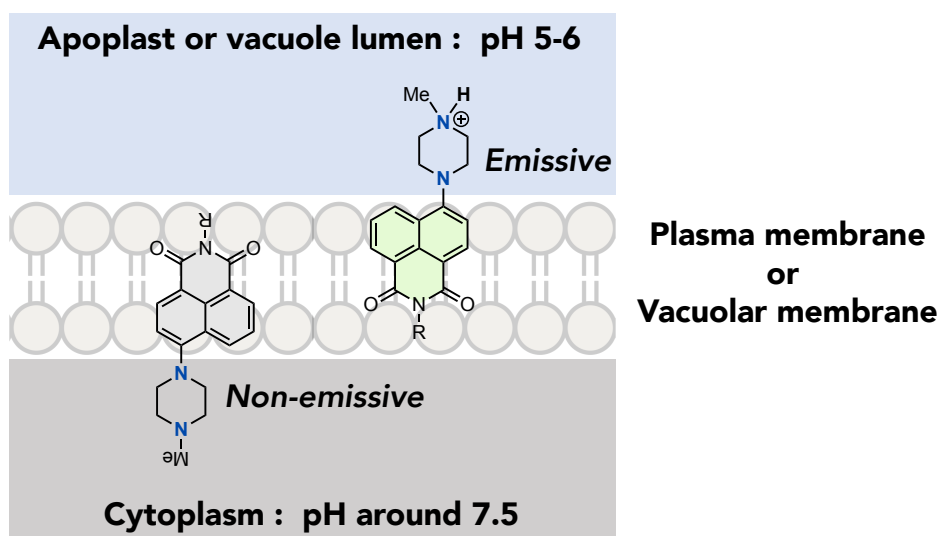

**Fig. S16.** Schematic illustration for the plasma- and vacuolar membrane-localized **2a**.

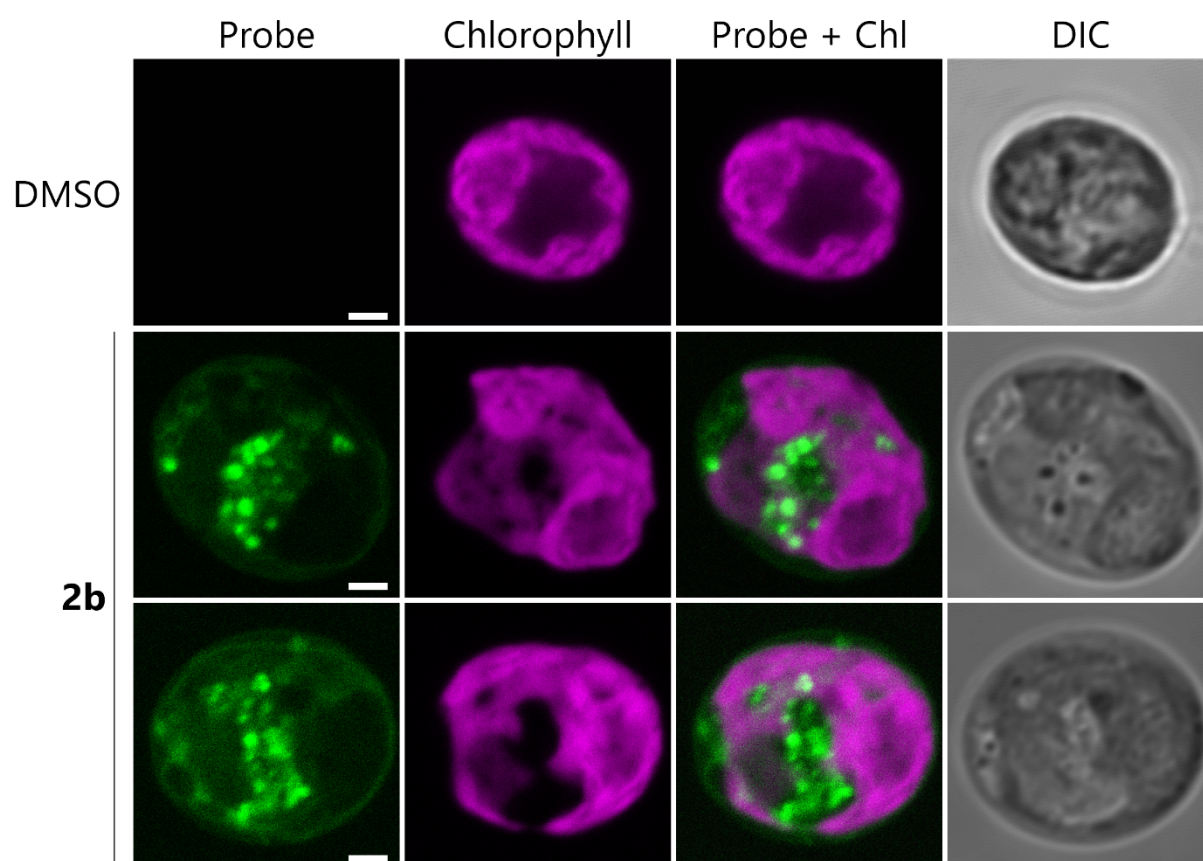

**Fig. S17.** Confocal images of representative cells of *C. reinhardtii* strain CC-124 with or without the probe **2b**. Two independent representative cells are shown for the cells stained with the probe **2b**. Differential interference contrast (DIC) images are also shown. Green, probe fluorescence; magenta, chlorophyll autofluorescence (Chl). Scale Bars = 2  $\mu$ m.

## V. Assessment of cell toxicity of naphthalimide-based probes

We monitored cell death in the leaves treated with the probes to assess their cytotoxicity. 10 mM MES-NaOH (pH 5.5) buffer containing 10  $\mu$ M probes (**1a**, **1d**, **2a**, or **2b**) were infiltrated into the second rosette leaves of *Arabidopsis* plants. After the incubation for 18 h, we confirmed that the presence of the probes does not lead to the appearance of dead cells. Dead cell stain was performed as previously described<sup>10</sup>, with slight modification. The leaves were incubated for 5 min at 95°C in lactophenol trypan blue solution (10 mL of lactic acid, 10 mL of glycerol, 10 g of phenol, 10 mg of trypan blue, dissolved in 10 mL of distilled water), followed by destaining in chloral hydrate solution (25 g of chloral hydrate dissolved in 10 mL of distilled water) for 30 min. The images were obtained via a microscopy (Axio Observer; Carl Zeiss) equipped with a Fluar 5 $\times$  objective (numerical aperture = 0.25; Carl Zeiss) and a CMOS camera (G3CMOS02300KPA; ToupTek).

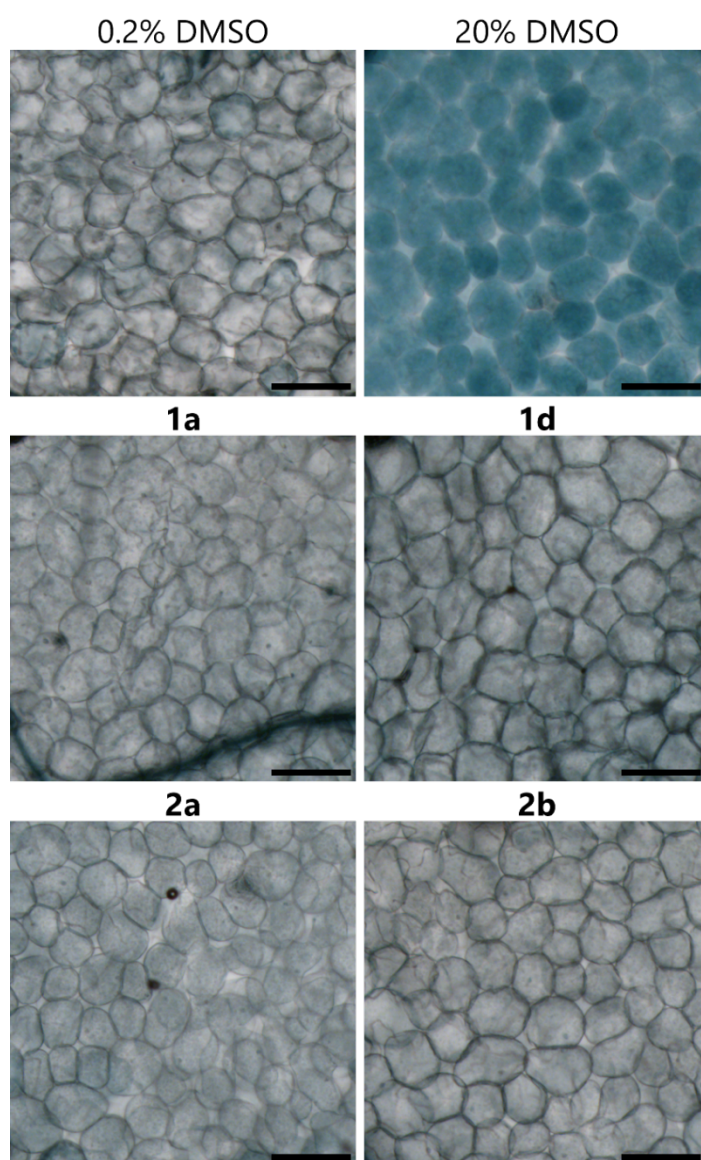

**Fig. S18.** Microscopy observations of dead cells in *Arabidopsis* leaf mesophyll cells. 0.2% DMSO (control)-infiltrated leaves and the probe **1a**, **1d**, **2a**, or **2b**-infiltrated leaves were incubated for 1 d and then stained with lactophenol trypan blue solution to detect dead cells. 20% DMSO treatment was performed as the condition that causes cell death largely. Scale Bars = 0.1 mm.

## VI. Synthesis of naphthlaimide-based probes 1 and 2

Compound **S1-S4** were synthesized as described in a previous report.<sup>11-13</sup> Compounds **1a** and **2a** were synthesized as following the reported procedure.<sup>14</sup>

### • General procedure for $S_NAr$ reactions of **S1**

To a solution of **S1** in DMF was added a secondary amine (morpholine or *N*-methyl piperazine). The mixture was heated at 90 °C and allowed to stir for 18 hours. After cooling to room temperature, the solvent was removed. The residue was applied for was purified by flash chromatography on a Biotage One instrument (SNAP ultra-column or Sfär D column, 5–50% CHCl<sub>3</sub>/AcOEt or 0–10% CHCl<sub>3</sub>/MeOH over 12 column volumes) to provide a solid product. For imaging studies, this resulting solid was further purified by washing with 10% EtOAc/Hexane to afford **1a** and **2a**, respectively.

### Synthesis of **1a**:

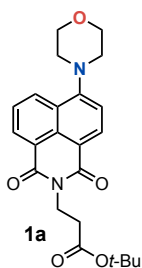

The reaction was performed with **S1** (2.82 g, 6.98 mmol) and morpholine (1.20 mL, 15.0 mmol) in DMF (10 mL). After the purification, compound **1a** (2.52 g, 62%) was afforded as a yellow-orange solid; <sup>1</sup>H NMR (600 MHz, CDCl<sub>3</sub>) δ 8.59 (dd, *J* = 1.1, 7.2 Hz, 1H), 8.52 (d, *J* = 8.0 Hz, 1H), 8.42 (dd, *J* = 1.1, 8.4 Hz, 1H), 7.70 (dd, *J* = 7.2, 8.4 Hz, 1H), 7.23 (d, *J* = 8.0 Hz, 1H), 4.43 (t, *J* = 7.6 Hz, 2H), 4.02-4.01 (m, 4H), 3.27-3.26 (m, 4H), 2.68 (t, *J* = 7.6 Hz, 2H), 1.42 (s, 9H); <sup>13</sup>C NMR (150 MHz, CDCl<sub>3</sub>) δ 170.7, 164.4, 163.9, 155.9, 132.7, 161.4, 130.3, 130.1, 126.3, 126.0, 123.4, 117.2, 115.31, 80.9, 67.1, 53.6, 36.3, 34.1, 28.2; HRMS(ESI): calculated for [M + Na]<sup>+</sup> requires *m/z* = 433.1739, found 433.1739.

### Synthesis of **2a**

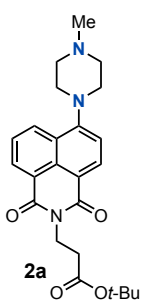

The reaction was performed with **S1** (350 mg, 0.866 mmol) and morpholine (1.43 mL, 13.0 mmol) in DMF (4.3 mL). After the purification, compound **2a** (297 mg, 81%) was afforded as a yellow-orange solid; <sup>1</sup>H NMR (600 MHz, CDCl<sub>3</sub>) δ 8.58 (dd, *J* = 1.1, 7.2 Hz, 1H), 8.51 (d, *J* = 8.1 Hz, 1H), 8.41 (dd, *J* = 1.1, 8.4 Hz, 1H), 7.69 (dd, *J* = 7.2, 8.4 Hz, 1H), 7.22 (d, *J* = 8.1 Hz, 1H), 4.44 (t, *J* = 7.1 Hz, 2H), 3.31 (brs, 4H), 2.75 (brs, 4H), 2.68 (t, *J* = 7.1 Hz, 2H), 2.44 (s, 3H), 1.42 (s, 9H); <sup>13</sup>C NMR (150 MHz, CDCl<sub>3</sub>) δ 170.7, 164.5, 163.9, 156.2, 132.8, 131.3, 130.6, 130.1, 126.3, 125.8, 123.3, 116.7, 115.1, 80.8, 55.3, 53.2, 46.3, 36.2, 34.1, 28.2; HRMS(ESI): calculated for [M + H]<sup>+</sup> requires *m/z* = 424.2236, found 424.2231.

### • General procedure for condensation reactions

To cleave the tertiary butyl group, **1a** and **2a** was treated with 4 M HCl/Dioxane (0.5-2 mL). After being stirred for 30-60 minutes at room temperature, HCl and dioxane were removed in vacuo. the resulting carboxylic acid was applied for the subsequent condensation reactions without any purification. To a solution of carboxylic acid in DMF/CH<sub>2</sub>Cl<sub>2</sub> (0.01-0.05 M), EDC•HCl (1.10-1.25 eq.), HOBT (1.10-1.25 eq.), and triethyl amine (1.10-2.25 eq.) were added to form an activated ester. After being stirred for 15 minutes, the corresponding amine (1.0-1.2



eq.) was added to the reaction solution. The mixture was allowed to stir at room temperature for 18 hours, after which the solution was diluted with CH<sub>2</sub>Cl<sub>2</sub> and washed with H<sub>2</sub>O and brine. The combined organic layer was washed with brine, dried over Na<sub>2</sub>SO<sub>4</sub>, and concentrated in vacuo. The residue was purified by flash chromatography on a Biotage One instrument (SNAP ultra-column or Sfär D column, 5–50% CHCl<sub>3</sub>/AcOEt or 0–10% CHCl<sub>3</sub>/MeOH over 12 column volumes) to provide a solid product. For imaging studies, this resulting solid was further purified by washing with 10–30% EtOAc/Hexane to afford **1** or **2**.

### Synthesis of **1b**

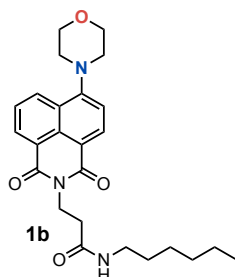

The reaction was performed with **1a** (41.0 mg, 0.100 mmol), hexylamine (12.1 mg, 0.120 mmol), EDC•HCl (22.2 mg, 0.120 mmol), HOBt (16.9 mg, 0.120 mmol), and triethyl amine (15.2 mg, 0.125 mmol) in DMF (1 mL) and CH<sub>2</sub>Cl<sub>2</sub> (2 mL). After the purification, compound **1b** was afforded as a yellow solid (26.2 mg, 30%); <sup>1</sup>H NMR (600 MHz, CDCl<sub>3</sub>) δ 8.59 (dd, *J* = 1.1, 7.2 Hz, 1H), 8.53 (d, *J* = 8.0 Hz, 1H), 8.43 (dd, *J* = 1.1, 8.4 Hz, 1H), 7.71 (dd, *J* = 7.2, 8.4 Hz, 1H), 7.23 (d, *J* = 8.0 Hz, 1H), 5.07 (brs, 1H), 4.47 (t, *J* = 7.2 Hz, 2H), 4.03–4.01 (m, 4H), 3.28–3.26 (m, 4H), 3.23 (dt, *J* = 6.0, 7.6 Hz, 2H), 2.68 (t, *J* = 7.2 Hz, 2H), 1.46 (quint, *J* = 7.2 Hz, 2H), 1.28–1.22 (m, 6H), 0.866 (t, *J* = 7.0 Hz, 3H); <sup>13</sup>C NMR (150 MHz, CDCl<sub>3</sub>) δ 170.3, 164.6, 164.2, 156.0, 132.9, 131.6, 130.5, 130.1, 126.3, 126.0, 123.2, 117.0, 115.1, 67.1, 53.6, 39.8, 36.9, 35.5, 31.6, 29.6, 26.8, 22.7, 14.2; HRMS(ESI): calculated for [M + Na]<sup>+</sup> requires *m/z* = 460.2212, found 460.2212.

### Synthesis of **1c**

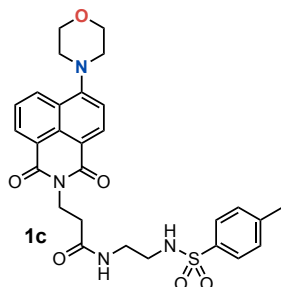

The reaction was performed with **1a** (17.4 mg, 42.3 μmol), **S2** (10.9 mg, 50.8 μmol), EDC•HCl (9.4 mg, 50.8 μmol), HOBt (7.2 mg, 50.8 μmol), and triethyl amine (6.4 mg, 0.635 mmol) in DMF (0.42 mL) and CH<sub>2</sub>Cl<sub>2</sub> (84 mL). After the purification, compound **1c** was afforded as a yellow solid (19.0 mg, 82%); <sup>1</sup>H NMR (600 MHz, DMSO-*d*<sub>6</sub>) δ 8.48 (dd, *J* = 1.0, 8.4 Hz, 1H), 8.42 (dd, *J* = 1.0, 7.2 Hz, 1H), 8.36 (d, *J* = 8.0 Hz, 1H), 7.95 (t, *J* = 5.8 Hz, 1H), 7.79 (dd, *J* = 7.2, 8.4 Hz, 1H), 7.66 (d, *J* = 8.2 Hz, 2H), 7.54 (d, *J* = 6.0 Hz, 1H), 7.40 (d, *J* = 8.2 Hz, 2H), 7.33 (d, *J* = 8.0 Hz, 1H), 4.20 (t, *J* = 7.6 Hz, 2H), 3.92–3.90 (m, 4H), 3.22–3.21 (m, 4H), 3.03 (t, *J* = 5.8, 6.5 Hz, 2H), 2.72 (dt, *J* = 6.0, 6.5 Hz, 2H), 2.39 (s, 3H), 2.38 (t, *J* = 7.6 Hz, 2H, overlapped with neighboring signal); <sup>13</sup>C NMR (150 MHz, DMSO-*d*<sub>6</sub>) δ 170.2, 163.4, 162.9, 155.4, 142.7, 137.5, 132.1, 130.6, 130.5, 129.7, 129.1, 126.5, 126.1, 125.3, 122.6, 115.9, 115.0, 79.2, 66.2, 53.0, 41.8, 38.5, 36.3, 33.8, 21.0; HRMS(ESI): calculated for [M + Na]<sup>+</sup> requires *m/z* = 573.1784, found 573.1783.

## Synthesis of 1d

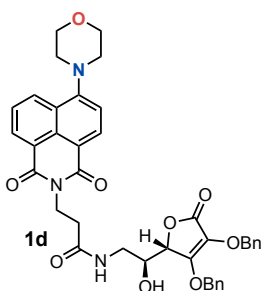

The reaction was performed with **1a** (143 mg, 0.348 mmol), **S3** (143 mg, 0.404 mmol), EDC•HCl (77.3 mg, 0.435  $\mu$ mol), HOBT (58.8 mg, 0.435 mmol), and triethyl amine (52.8 mg, 0.522 mmol) in DMF (7 mL) and CH<sub>2</sub>Cl<sub>2</sub> (14 mL). After the purification, compound **1d** was afforded as a yellow solid (61.8 mg, 26%); <sup>1</sup>H NMR (600 MHz, CDCl<sub>3</sub>)  $\delta$  8.51 (d,  $J$  = 7.8 Hz, 1H), 8.45 (d,  $J$  = 7.2 Hz, 1H), 8.38 (d,  $J$  = 7.8 Hz, 1H), 7.63 (dd,  $J$  = 7.2, 7.8 Hz, 1H), 7.39-7.32 (m, 8H), 7.23-7.22 (m, 2H), 7.18 (d,  $J$  = 7.8 Hz, 1H), 6.62 (brs, 1H), 5.22 (d,  $J$  = 11.8 Hz, 1H), 5.12 (d,  $J$  = 11.8 Hz, 1H), 5.07 (d,  $J$  = 12.0 Hz, 1H), 5.05 (d,  $J$  = 12.0 Hz, 1H), 4.58 (d,  $J$  = 2.0 Hz, 1H), 4.52 (ddd,  $J$  = 7.2, 7.2, 13.2 Hz, 1H), 4.43 (ddd,  $J$  = 6.3, 6.3, 13.2 Hz, 1H), 4.05-4.03 (m, 1H), 4.01-3.99 (m, 4H), 3.66-3.62 (m, 1H), 3.33-3.28 (m, 1H), 3.24-3.22 (m, 4H), 2.72 (ddd,  $J$  = 7.2, 7.2, 14.8 Hz, 1H), 2.66 (ddd,  $J$  = 6.3, 6.3, 14.8 Hz, 1H); <sup>13</sup>C NMR (150 MHz, CDCl<sub>3</sub>)  $\delta$  172.1, 169.5, 164.7, 164.3, 157.2, 156.1, 136.2, 135.6, 133.0, 131.6, 130.6, 130.1, 129.3, 128.81, 128.79, 128.77, 127.9, 126.2, 126.0, 123.1, 121.4, 116.8, 115.2, 76.8, 74.0, 73.6, 68.3, 67.1, 53.6, 43.2, 37.0, 35.5; HRMS(ESI): calculated for [M + Na]<sup>+</sup> requires  $m/z$  = 714.2427, found 714.2430.

## Synthesis of 2b

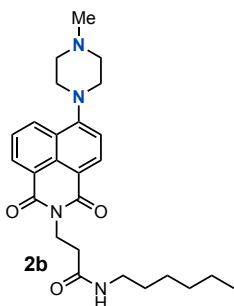

The reaction was performed with **2a** (99.4 mg, 0.235 mmol), hexylamine (28.6 mg, 0.282 mmol), EDC•HCl (52.2 mg, 0.294  $\mu$ mol), HOBT (39.7 mg, 0.294 mmol), and triethyl amine (59.5 mg, 0.588 mmol) in DMF (2.5 mL) and CH<sub>2</sub>Cl<sub>2</sub> (5 mL). After the purification, compound **2b** was afforded as a dark yellow solid (21.7 mg, 20%); <sup>1</sup>H NMR (600 MHz, CDCl<sub>3</sub>)  $\delta$  8.58 (dd,  $J$  = 1.0, 7.2 Hz, 1H), 8.51 (d,  $J$  = 8.1 Hz, 1H), 8.41 (dd,  $J$  = 1.0, 8.4 Hz, 1H), 7.69 (dd,  $J$  = 7.2, 8.4 Hz, 1H), 7.22 (d,  $J$  = 8.1 Hz, 1H), 6.09 (brs, 1H), 4.42 (t,  $J$  = 7.2 Hz, 2H), 3.31 (brs, 4H), 3.23 (dt,  $J$  = 5.8, 7.2 Hz, 2H), 2.75 (brs, 4H), 2.69 (t,  $J$  = 7.2 Hz, 2H), 2.44 (s, 3H), 1.46 (quint,  $J$  = 7.2 Hz, 2H), 1.28-1.22 (m, 6H), 0.849 (t,  $J$  = 6.8 Hz, 3H); <sup>13</sup>C NMR (150 MHz, CDCl<sub>3</sub>)  $\delta$  170.4, 164.7, 164.2, 156.4, 133.0, 131.5, 130.7, 130.1, 126.3, 125.8, 123.1, 116.5, 115.1, 55.3, 53.2, 46.3, 39.8, 36.9, 35.5, 31.6, 29.6, 26.8, 22.7, 14.2; HRMS(ESI): calculated for [M + H]<sup>+</sup> requires  $m/z$  = 451.2709, found 451.2712.

## Synthesis of 2c

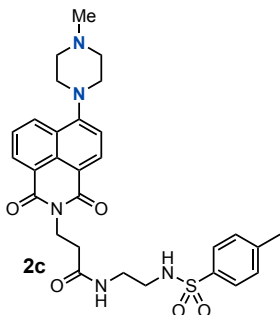

The reaction was performed with **2a** (99.4 mg, 0.235 mmol), **S2** (60.5 mg, 0.282 mmol), EDC•HCl (52.2 mg, 0.294  $\mu$ mol), HOBT (39.7 mg, 0.294 mmol), and triethyl amine (59.5 mg, 0.588 mmol) in DMF (2.5 mL) and CH<sub>2</sub>Cl<sub>2</sub> (5 mL). After the purification, compound **2c** was afforded as a yellow solid (18.3 mg, 14%); <sup>1</sup>H NMR (600 MHz, DMSO-*d*<sub>6</sub>)  $\delta$  8.48 (dd,  $J$  = 1.0, 8.4 Hz, 1H), 8.42 (dd,  $J$  = 1.0, 7.2 Hz, 1H), 8.36 (d,  $J$  = 8.0 Hz, 1H), 7.95 (t,  $J$  = 5.8 Hz, 1H), 7.79 (dd,  $J$  = 7.2, 8.4 Hz, 1H), 7.66 (d,  $J$  = 8.2 Hz, 2H), 7.54 (d,  $J$  = 6.0 Hz, 1H), 7.40 (d,  $J$  = 8.2 Hz, 2H), 7.33 (d,  $J$  = 8.0 Hz, 1H), 4.20 (t,  $J$  = 7.6 Hz, 2H), 3.92-3.90 (m, 4H), 3.22-3.21 (m, 4H), 3.03 (t,  $J$  = 5.8, 6.5 Hz, 2H), 2.72 (dt,  $J$  = 6.0, 6.5 Hz, 2H), 2.39 (s, 3H), 2.38 (t,  $J$  = 7.6 Hz, 2H, overlapped with neighboring signal); <sup>13</sup>C NMR (150 MHz, DMSO-*d*<sub>6</sub>)  $\delta$  171.8, 164.8, 164.4, 156.5, 143.4, 137.4, 133.3, 131.7, 130.9, 130.0, 129.9,

### Synthesis of 2d

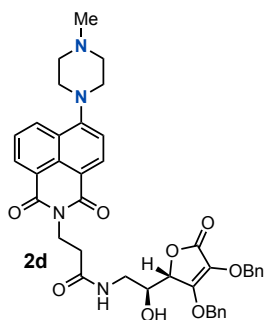

S22

**1a: <sup>1</sup>H NMR (600 MHz, CDCl<sub>3</sub>)**

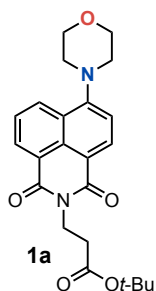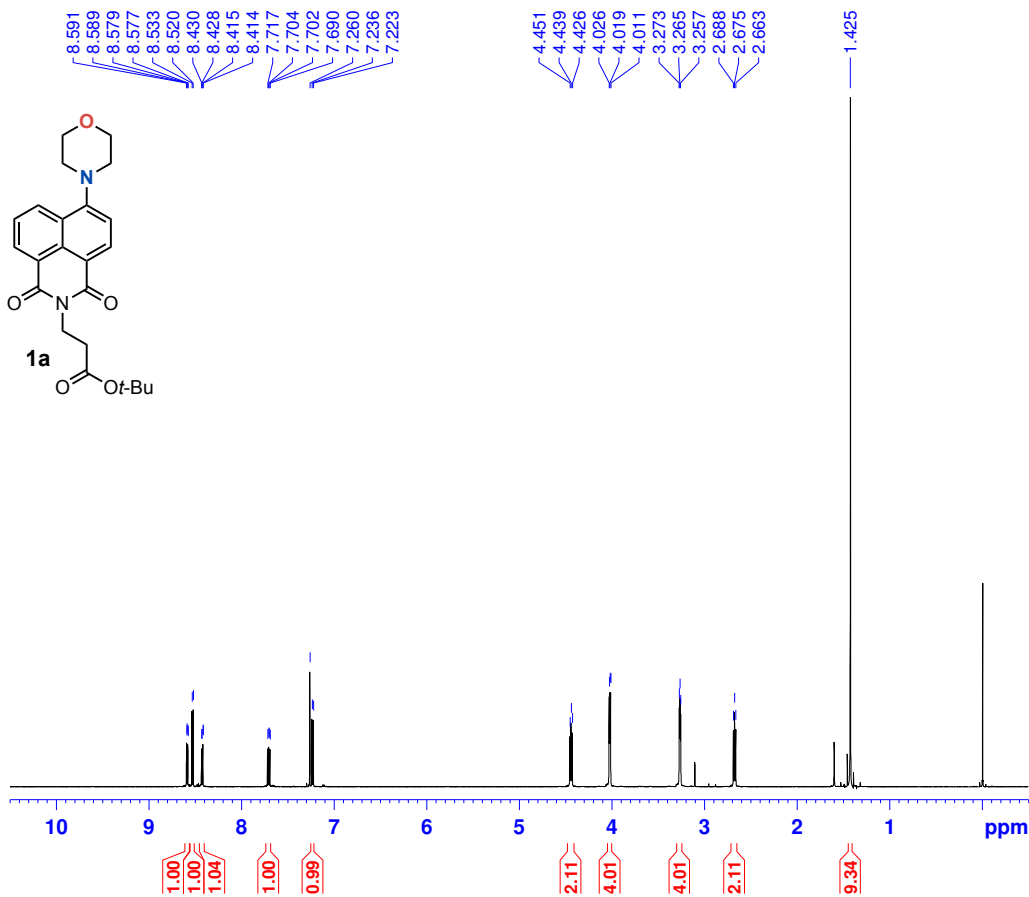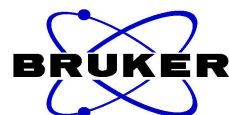

```

NAME          sk-7-19
EXPNO         1
PROCNO        1
Date_         20210609
Time          10.23
INSTRUM       spect
PROBHD        5 mm TXI 1H/2H
PULPROG       zg30
TD            65536
SOLVENT       CDCl3
NS            4
DS            2
SWH           12376.237 Hz
FIDRES        0.188846 Hz
AQ            2.6477449 sec
RG            228.1
DW            40.400 usec
DE            6.50 usec
TE            298.0 K
D1            1.00000000 sec
D11           1
D10           1

===== CHANNEL f1 =====
NUC1          1H
P1            8.00 usec
PL1           -1.00 dB
PL1W          31.62277603 W
SFO1          600.037054 MHz
SI            32768
SF            600.0300139 MHz
WDW           EM
SSB           0
LB            0.30 Hz
GB            0
PC            1.00
    
```

**1a: <sup>13</sup>C NMR (150 MHz, CDCl<sub>3</sub>)**

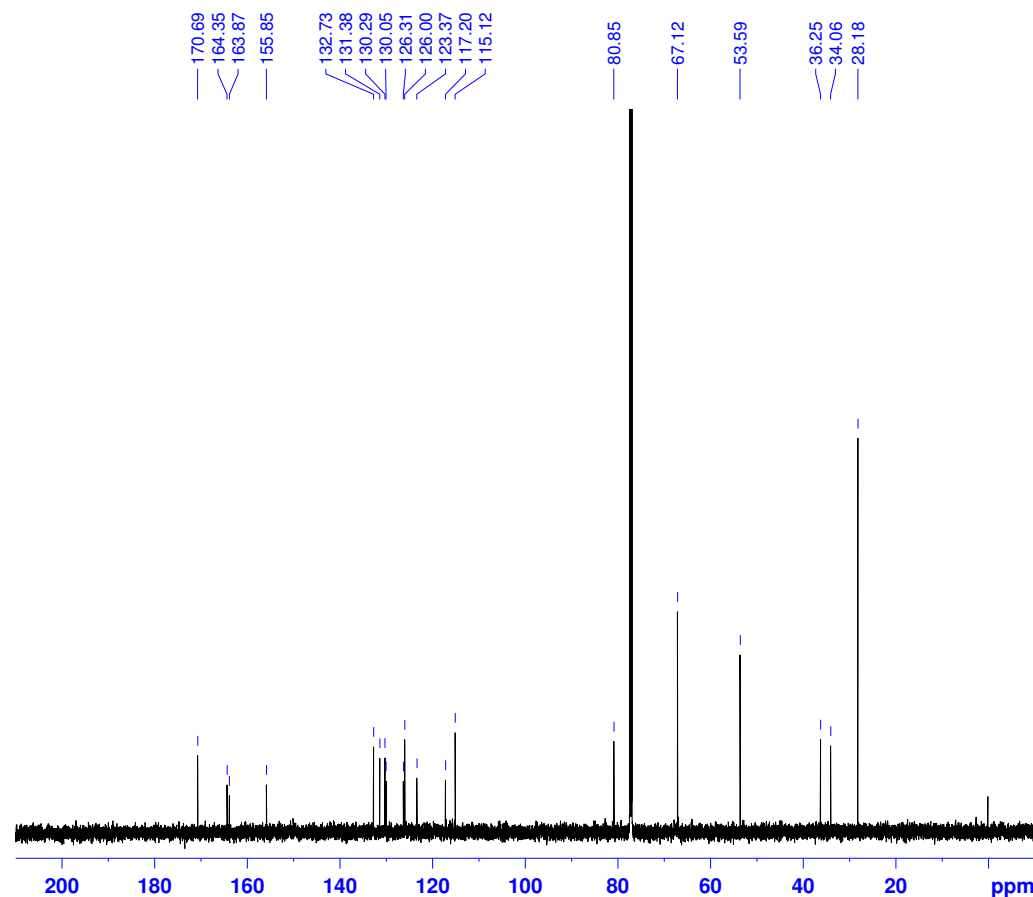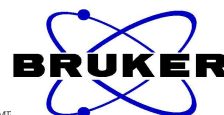

```

NAME          sk-7-19
EXPNO         1
PROCNO        1
Date_         20210609
Time          11.17
INSTRUM       spect
PROBHD        5 mm TXI 1H/2H
PULPROG       zgpg30
TD            65536
SOLVENT       CDCl3
NS            662
DS            4
SWH           35971.223 Hz
FIDRES        0.548877 Hz
AQ            0.9110143 sec
RG            20642.5
DW            13.900 usec
DE            6.50 usec
TE            298.0 K
D1            4.00000000 sec
D11           0.03000000 sec
D10           1

===== CHANNEL f1 =====
NUC1          13C
P1            15.00 usec
PL1           -3.20 dB
PL1W          262.40374756 W
SFO1          150.8927508 MHz

===== CHANNEL f2 =====
CPDPRG2       waltz16
NUC2          1H
PCPD2         80.00 usec
PL2           1.00 dB
PL12          19.00 dB
PL13          19.00 dB
PL2W          19.95262337 W
PL12W         0.31622776 W
PL13W         0.31622776 W
SFO2          600.0324001 MHz
SI            32768
SF            150.8776431 MHz
WDW           EM
SSB           0
LB            1.00 Hz
GB            0
PC            1.40
    
```

**1b: <sup>1</sup>H NMR (600 MHz, CDCl<sub>3</sub>)**

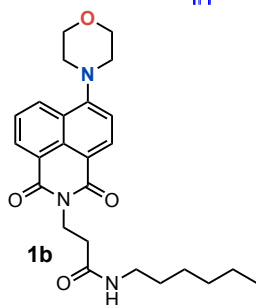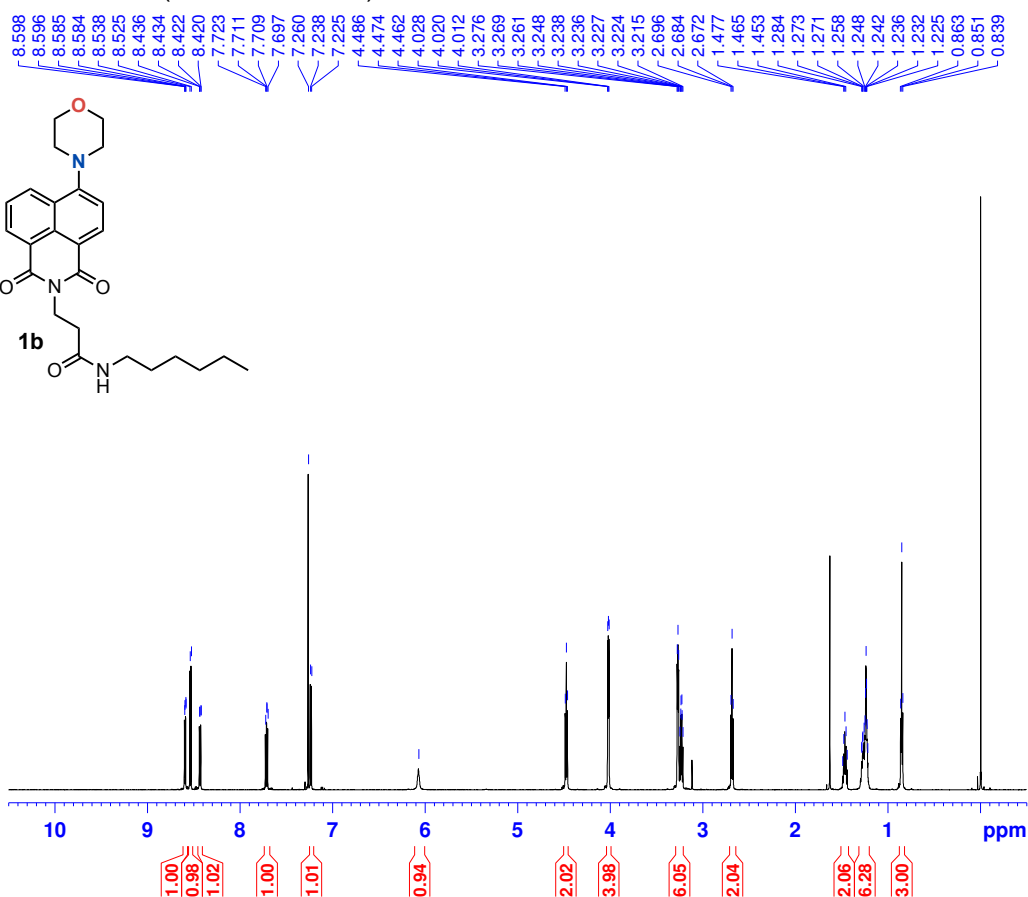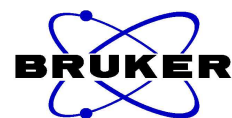

```

NAME      sk-1-1102 20210610
EXPNO     1
PROCNO    1
Date_     20210610
Time      11.10
INSTRUM   spect
PROBHD    5 mm TXI 1H/2H
PULPROG   zg30
TD         65536
SOLVENT   CDCl3
NS         4
DS         2
SWH        12376.237 Hz
FIDRES     0.188846 Hz
AQ         2.6477449 sec
RG         256
DW         40.400 usec
DE         6.50 usec
TE         298.0 K
D1         1.00000000 sec
TD0        1
    
```

```

===== CHANNEL f1 =====
NUC1       1H
P1         8.00 usec
PL1        -1.00 dB
PL1W       31.62277603 W
SFO1       600.0337054 MHz
SI         32768
SF         600.0300138 MHz
WDW        EM
SSB        0
LB         0.30 Hz
GB         0
PC         1.00
    
```

**1b: <sup>13</sup>C NMR (150 MHz, CDCl<sub>3</sub>)**

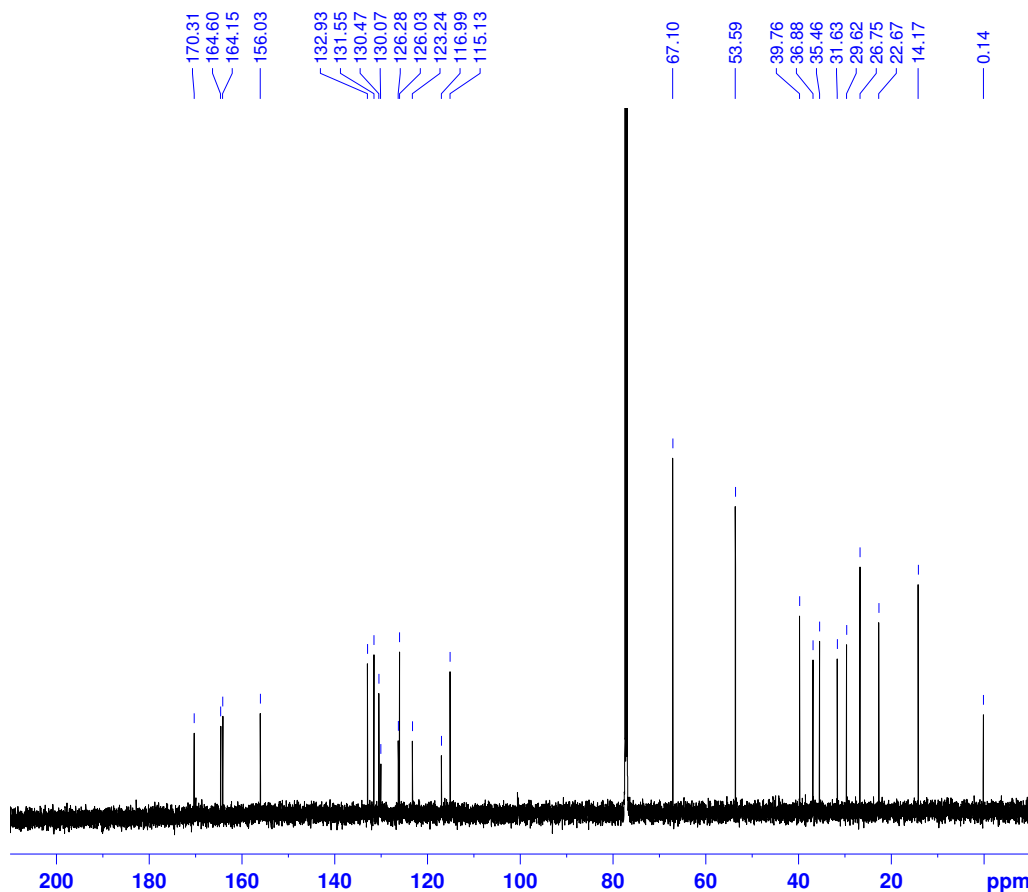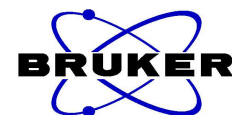

```

NAME      sk-1-1102 13C 20210610
EXPNO     1
PROCNO    1
Date_     20210610
Time      15.41
INSTRUM   spect
PROBHD    5 mm TXI 1H/2H
PULPROG   zgpg30
TD         65536
SOLVENT   CDCl3
NS         4
DS         2
SWH        35971.223 Hz
FIDRES     0.548877 Hz
AQ         0.9110143 sec
RG         20642.5
DW         13.900 usec
DE         6.50 usec
TE         298.0 K
D1         4.00000000 sec
D11        0.03000000 sec
TD0        1
    
```

```

===== CHANNEL f1 =====
NUC1       13C
P1         15.00 usec
PL1        -3.20 dB
PL1W       262.40374756 W
SFO1       150.8927508 MHz

===== CHANNEL f2 =====
CPDPRG2   waltz16
NUC2       1H
PCPD2     80.00 usec
PL2        1.00 dB
PL12       19.00 dB
PL13       19.00 dB
PL2W       19.95262337 W
PL12W      0.31622776 W
PL13W      0.31622776 W
SFO2       600.0324001 MHz
SI         32768
SF         150.8776430 MHz
WDW        EM
SSB        0
LB         1.00 Hz
GB         0
PC         1.40
    
```

**1c: <sup>1</sup>H NMR (600 MHz, DMSO-*d*<sub>6</sub>)**

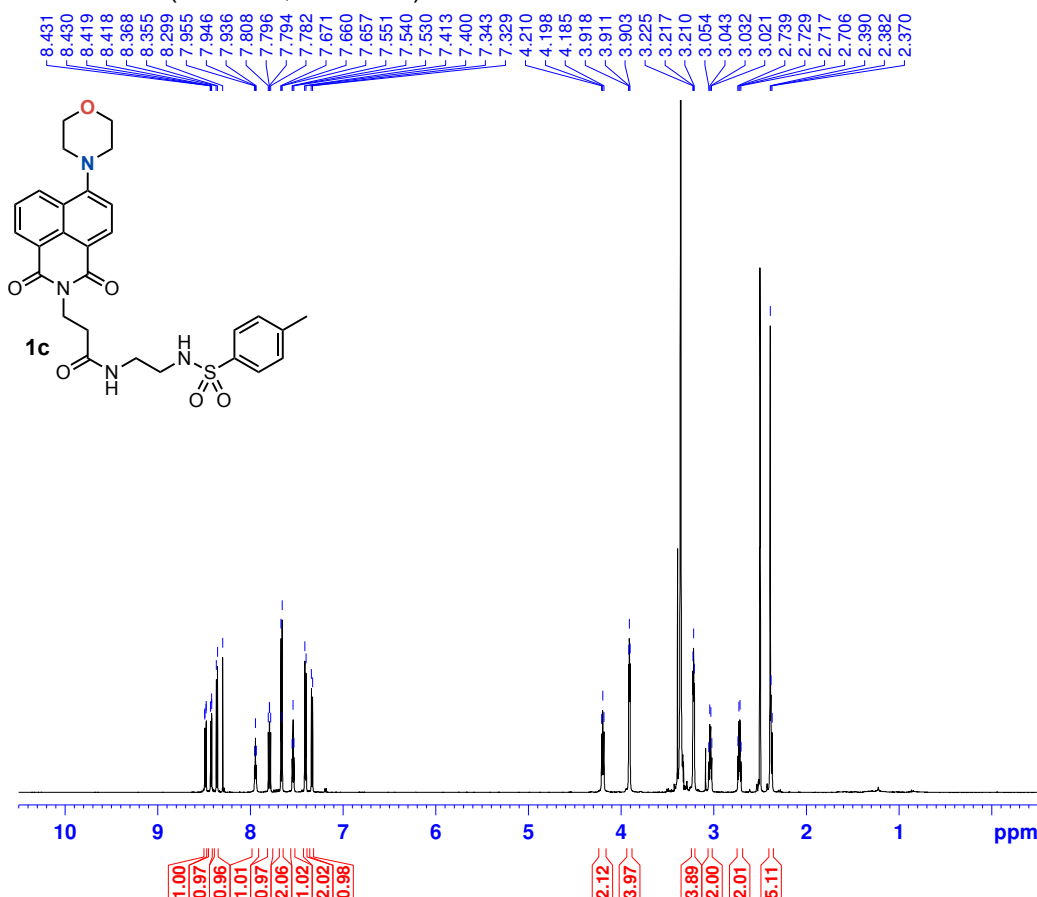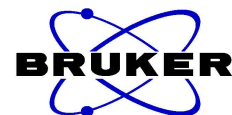

```

NAME      sk-1-1125 DMSO
EXPNO     1
PROCNO    1
Date_     20210217
Time      10.32
INSTRUM   spect
PROBHD    5 mm TXI 1H/2H
PULPROG   zg30
TD         65536
SOLVENT   DMSO
NS         8
DS         2
SWH        12376.237 Hz
FIDRES     0.188846 Hz
AQ         2.6477449 sec
RG         90.5
DW         40.400 usec
DE         6.50 usec
TE         300.5 K
D1         1.00000000 sec
TD0        1
    
```

```

===== CHANNEL f1 =====
NUC1      1H
P1         8.00 usec
PL1        -1.00 dB
PL1W       31.62277603 W
SFO1      600.0337054 MHz
SI         32768
SF         600.0300043 MHz
WDW        EM
SSB         0
LB          0.30 Hz
GB          0
PC          1.00
    
```

**1c: <sup>13</sup>C NMR (150 MHz, DMSO-*d*<sub>6</sub>)**

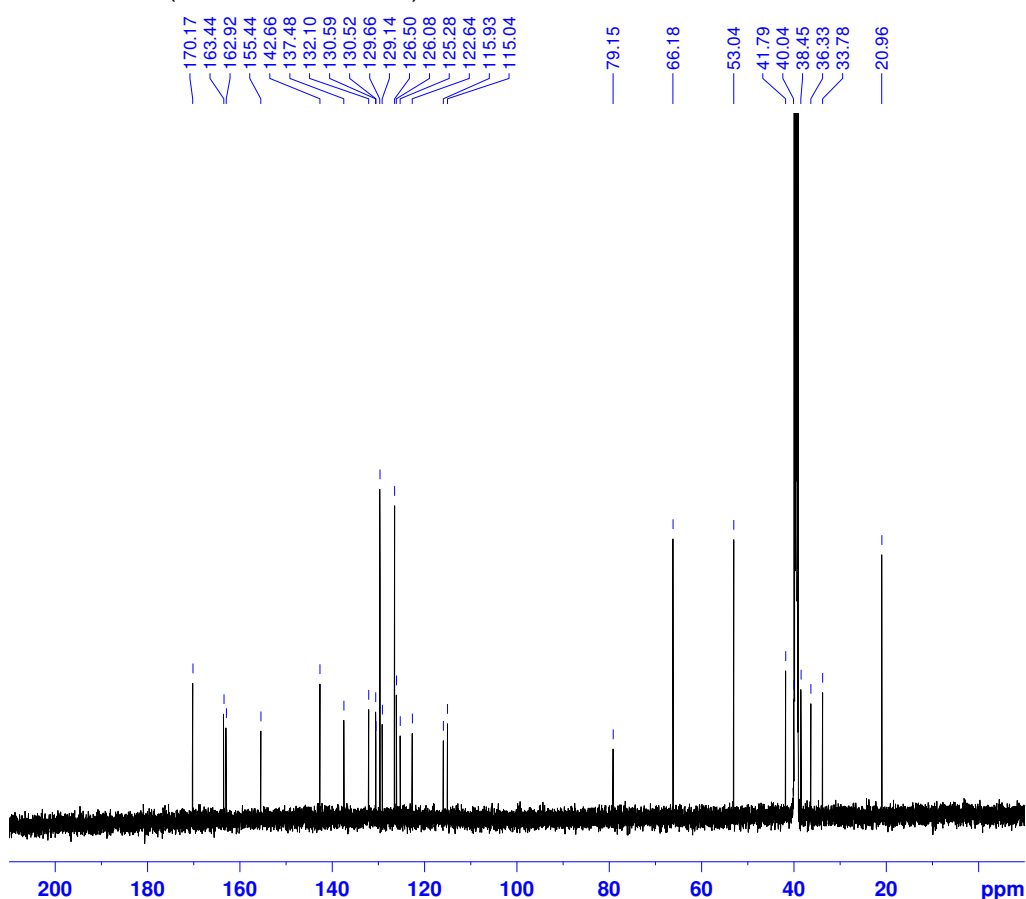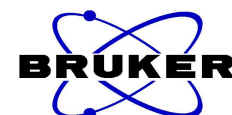

```

NAME      sk-1-1125 DMSO 13C
EXPNO     1
PROCNO    1
Date_     20210217
Time      15.06
INSTRUM   spect
PROBHD    5 mm TXI 1H/2H
PULPROG   zgpg30
TD         65536
SOLVENT   DMSO
NS         4198
DS         4
SWH        35971.223 Hz
FIDRES     0.548877 Hz
AQ         0.9110143 sec
RG         23170.5
DW         13.900 usec
DE         6.50 usec
TE         300.7 K
D1         6.00000000 sec
D11        0.03000000 sec
TD0        1
    
```

```

===== CHANNEL f1 =====
NUC1      13C
P1         15.00 usec
PL1        -3.20 dB
PL1W       262.40374756 W
SFO1      150.8927508 MHz
    
```

```

===== CHANNEL f2 =====
CPDPRG2   waltz16
NUC2       1H
PCPD2      80.00 usec
PL2         1.00 dB
PL12        19.00 dB
PL13        19.00 dB
PL2W       19.95262337 W
PL12W      0.31622776 W
PL13W      0.31622776 W
SFO2      600.0324001 MHz
SI         32768
SF         150.8777352 MHz
WDW        EM
SSB         0
LB          1.00 Hz
GB          0
PC          1.40
    
```

1d: <sup>1</sup>H NMR (600 MHz, CDCl<sub>3</sub>)

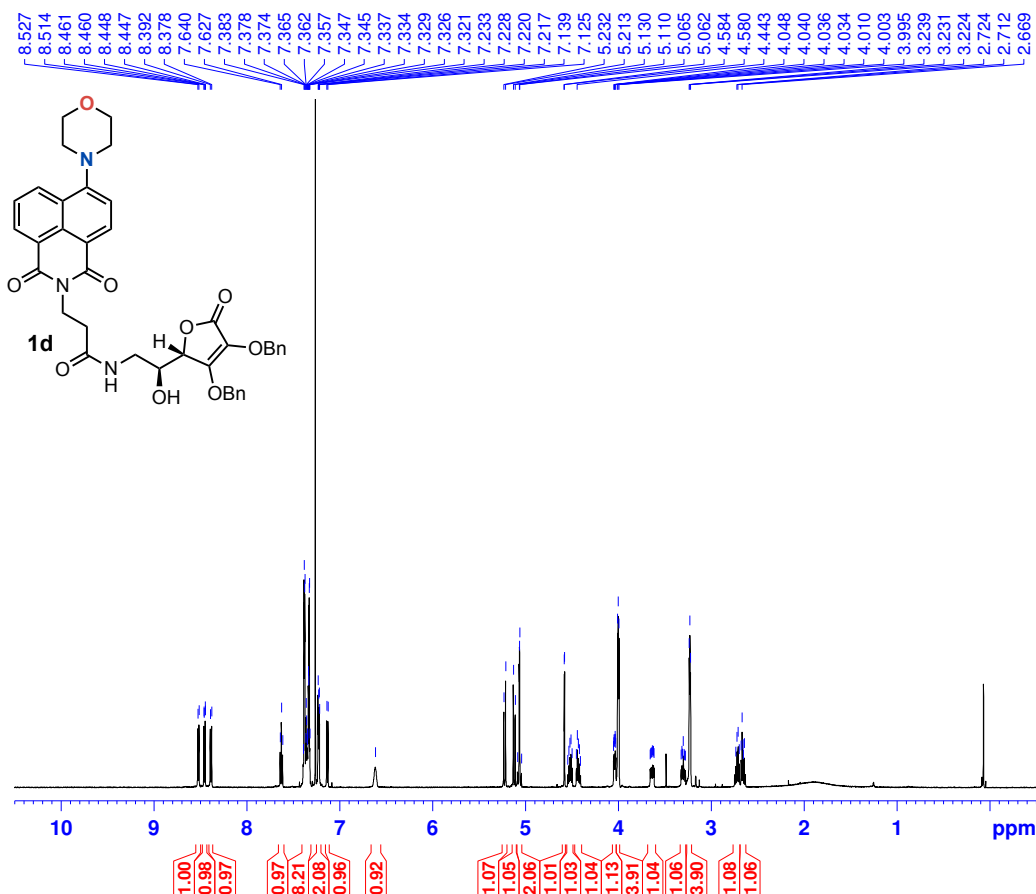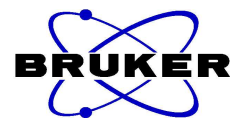

NAME sk-1-363  
EXPNO 2  
PROCNO 1  
Date\_ 20190715  
Time 10.54  
INSTRUM spect  
PROBHD 5 mm TXI 1H/2H  
PULPROG zg30  
TD 65536  
SOLVENT CDCl3  
NS 4  
DS 2  
SWH 12376.237 Hz  
FIDRES 0.188846 Hz  
AQ 2.6477449 sec  
RG 362  
DW 40.400 usec  
DE 6.50 usec  
TE 298.0 K  
D1 1.00000000 sec  
TD0 1

===== CHANNEL f1 =====  
NUC1 1H  
P1 8.00 usec  
PL1 -1.00 dB  
PL1W 31.62277603 W  
SFO1 600.0337054 MHz  
SI 32768  
SF 600.0300142 MHz  
WDW EM  
SSB 0  
LB 0.30 Hz  
GB 0  
PC 1.00

1d: <sup>13</sup>C NMR (150 MHz, CDCl<sub>3</sub>)

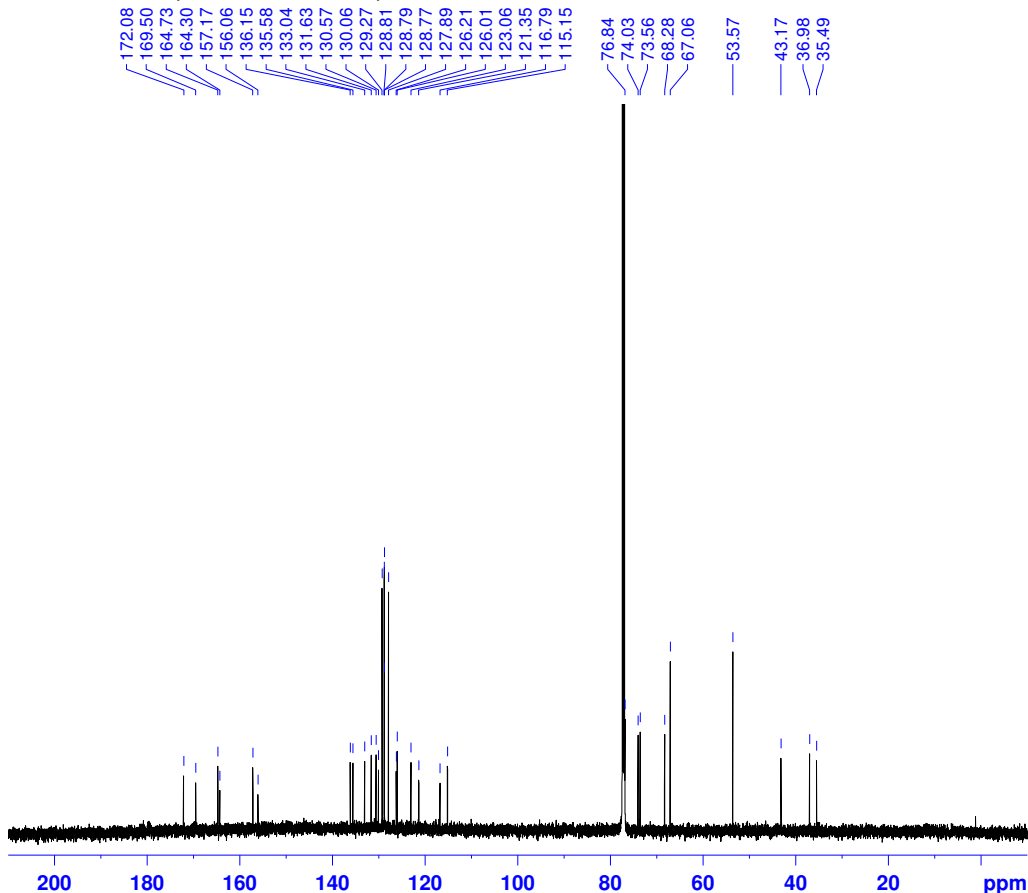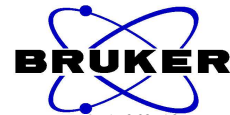

NAME sk-1-363 13C  
EXPNO 2  
PROCNO 1  
Date\_ 20190716  
Time 11.42  
INSTRUM spect  
PROBHD 5 mm TXI 1H/2H  
PULPROG zgpg30  
TD 65536  
SOLVENT CDCl3  
NS 12000  
DS 4  
SWH 35971.223 Hz  
FIDRES 0.548877 Hz  
AQ 0.9110143 sec  
RG 18390.4  
DW 13.900 usec  
DE 6.50 usec  
TE 298.0 K  
D1 4.00000000 sec  
D11 0.03000000 sec  
TD0 1

===== CHANNEL f1 =====  
NUC1 13C  
P1 15.00 usec  
PL1 -3.20 dB  
PL1W 262.40374756 W  
SFO1 150.8927508 MHz  
  
===== CHANNEL f2 =====  
CPDPRG2 waltz16  
NUC2 1H  
PCPD2 80.00 usec  
PL2 1.00 dB  
PL12 19.00 dB  
PL13 19.00 dB  
PL2W 19.95262337 W  
PL12W 0.31622776 W  
PL13W 0.31622776 W  
SFO2 600.0324001 MHz  
SI 32768  
SF 150.8776429 MHz  
WDW EM  
SSB 0  
LB 1.00 Hz  
GB 0  
PC 1.40

**2a: <sup>1</sup>H NMR (600 MHz, CDCl<sub>3</sub>)**

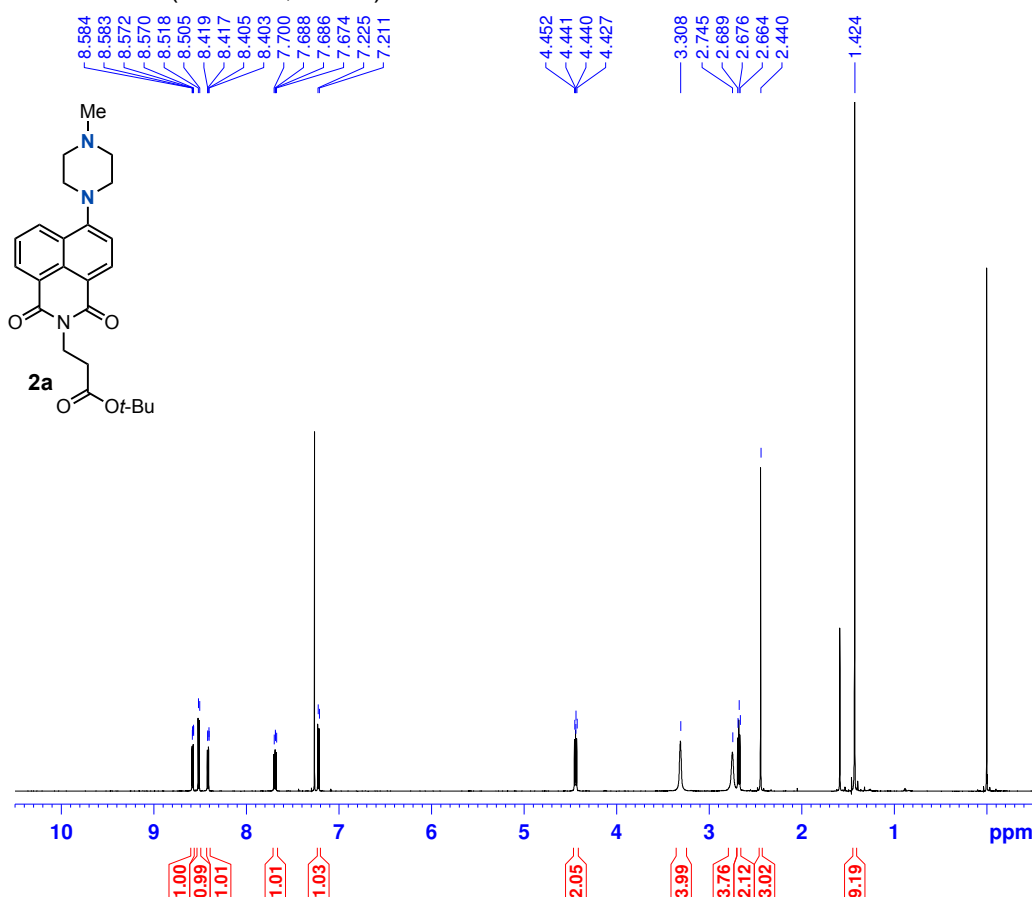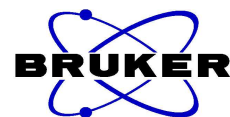

```

NAME      sk-1-1066
EXPNO     2
PROCNO    1
Date_     20210108
Time      20.37
INSTRUM   spect
PROBHD    5 mm TXI 1H/2H
PULPROG   zg30
TD         65536
SOLVENT   CDCl3
NS         4
DS         2
SWH       12376.237 Hz
FIDRES    0.188846 Hz
AQ        2.6477449 sec
RG         362
DW        40.400 usec
DE        6.50 usec
TE        298.0 K
D1        1.00000000 sec
D10       1
  
```

```

===== CHANNEL f1 =====
NUC1      1H
P1        8.00 usec
PL1       -1.00 dB
PL1W      31.62277603 W
SFO1      600.0337054 MHz
SI        32768
SF        600.0300138 MHz
WDW       EM
SSB       0
LB        0.30 Hz
GB        0
PC        1.00
  
```

**2a: <sup>13</sup>C NMR (150 MHz, CDCl<sub>3</sub>)**

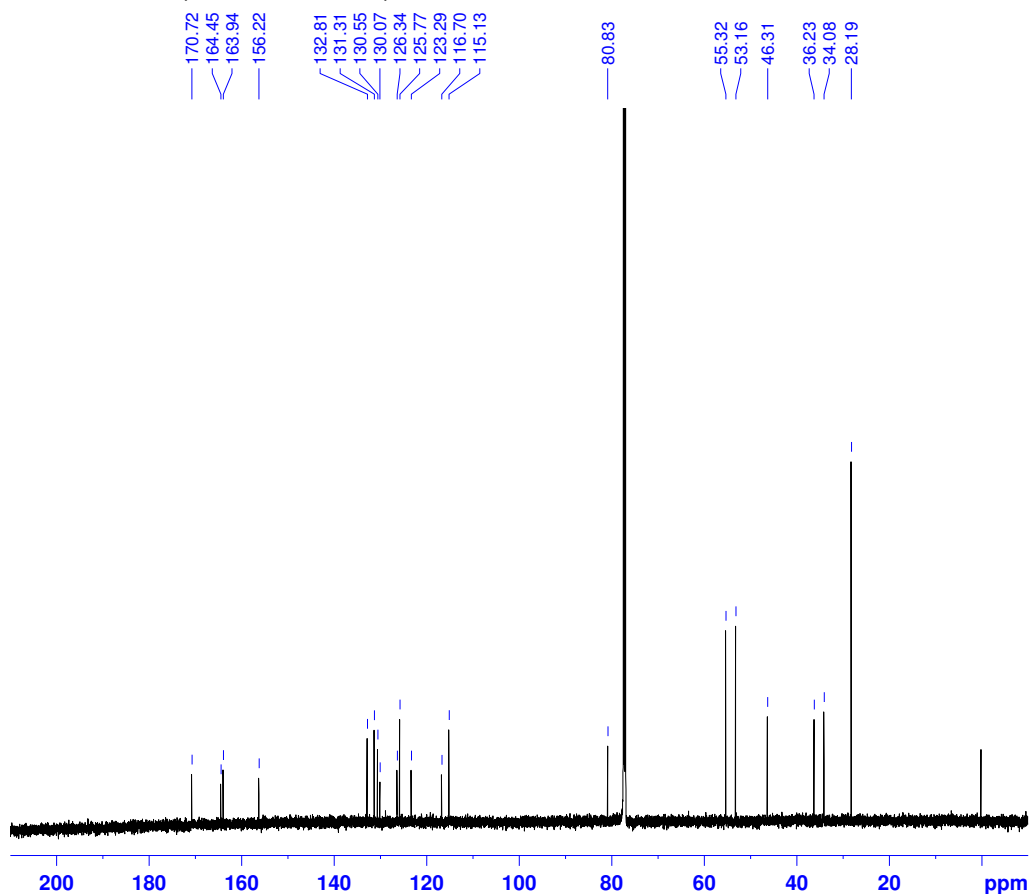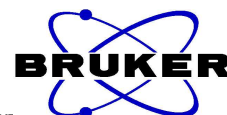

```

NAME      sk-1-1066 13C
EXPNO     1
PROCNO    1
Date_     20210109
Time      10.28
INSTRUM   spect
PROBHD    5 mm TXI 1H/2H
PULPROG   zgpg30
TD         65536
SOLVENT   CDCl3
NS         10000
DS         4
SWH       35971.223 Hz
FIDRES    0.548877 Hz
AQ        0.9110143 sec
RG        18390.4
DW        13.900 usec
DE        6.50 usec
TE        298.0 K
D1        4.00000000 sec
D11       0.03000000 sec
D10       1
  
```

```

===== CHANNEL f1 =====
NUC1      13C
P1        15.00 usec
PL1       -3.20 dB
PL1W      262.40374756 W
SFO1      150.8927508 MHz
  
```

```

===== CHANNEL f2 =====
CPDPRG2   waltz16
NUC2      1H
PCPD2     80.00 usec
PL2        1.00 dB
PL12      19.00 dB
PL13      19.00 dB
PL2W      19.95262337 W
PL12W     0.31622776 W
PL13W     0.31622776 W
SFO2      600.0324001 MHz
SI        32768
SF        150.8776420 MHz
WDW       EM
SSB       0
LB        1.00 Hz
GB        0
PC        1.40
  
```



**2b: <sup>1</sup>H NMR (600 MHz, CDCl<sub>3</sub>)**

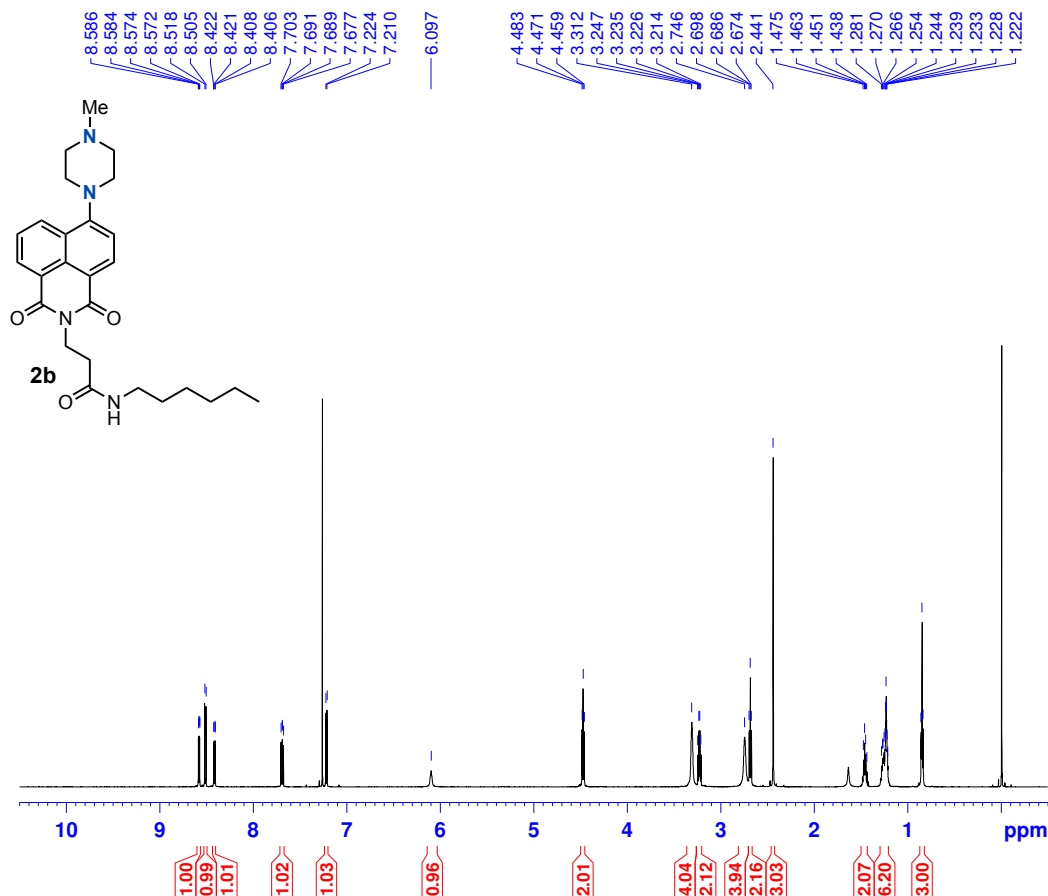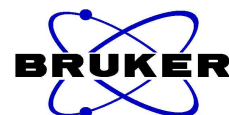

```

NAME      sk-1-1103 20210610
EXPNO     1
PROCNO    1
Date_     20210610
Time      15.51
INSTRUM   spect
PROBHD    5 mm TXI 1H/2H
PULPROG   zg30
TD         65536
SOLVENT   CDCl3
NS         8
DS         2
SWH        12376.237 Hz
FIDRES     0.188846 Hz
AQ         2.6477449 sec
RG         362
DW         40.400 usec
DE         6.50 usec
TE         298.0 K
D1         1.00000000 sec
TD0        1

===== CHANNEL f1 =====
NUC1       1H
P1         8.00 usec
PL1        -1.00 dB
PL1W       31.62277603 W
SFO1       600.0337054 MHz
SI         32768
SF         600.0300141 MHz
WDW        EM
SSB        0
LB         0.30 Hz
GB         0
PC         1.00
    
```

**2b: <sup>13</sup>C NMR (150 MHz, CDCl<sub>3</sub>)**

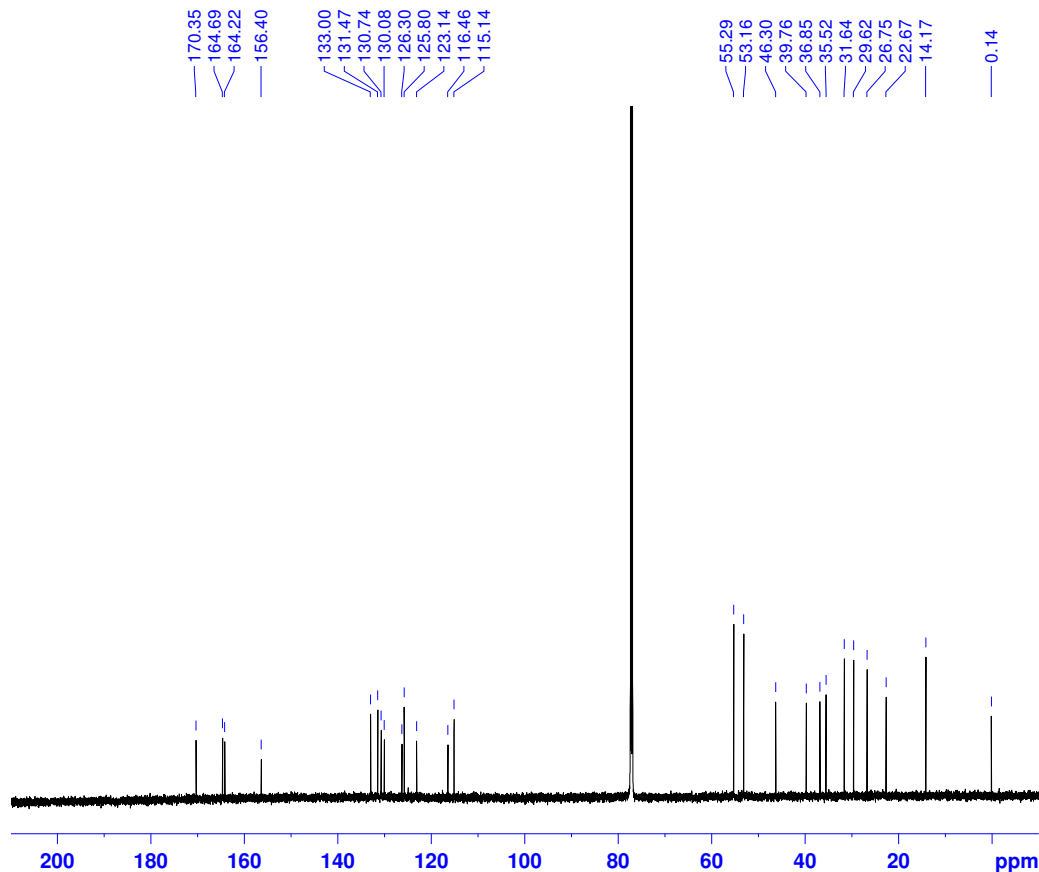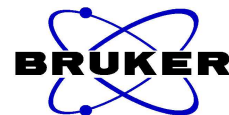

```

NAME      sk-1-1103 20210610 13C
EXPNO     1
PROCNO    1
Date_     20210611
Time      10.26
INSTRUM   spect
PROBHD    5 mm TXI 1H/2H
PULPROG   zgpg30
TD         65536
SOLVENT   CDCl3
NS         13384
DS         4
SWH        35971.223 Hz
FIDRES     0.548877 Hz
AQ         0.9110143 sec
RG         23170.5
DW         13.900 usec
DE         6.50 usec
TE         298.0 K
D1         4.00000000 sec
D11        0.03000000 sec
TD0        1

===== CHANNEL f1 =====
NUC1       13C
P1         15.00 usec
PL1        -3.20 dB
PL1W       262.40374756 W
SFO1       150.8927508 MHz

===== CHANNEL f2 =====
CPDPRG2    waltz16
NUC2       1H
PCPD2      80.00 usec
PL2        1.00 dB
PL12       19.00 dB
PL13       19.00 dB
PL2W       19.95262337 W
PL12W      0.31622776 W
PL13W      0.31622776 W
SFO2       600.0324001 MHz
SI         32768
SF         150.8776428 MHz
WDW        EM
SSB        0
LB         1.00 Hz
GB         0
PC         1.40
    
```

**2c: <sup>1</sup>H NMR (600 MHz, CDCl<sub>3</sub>)**

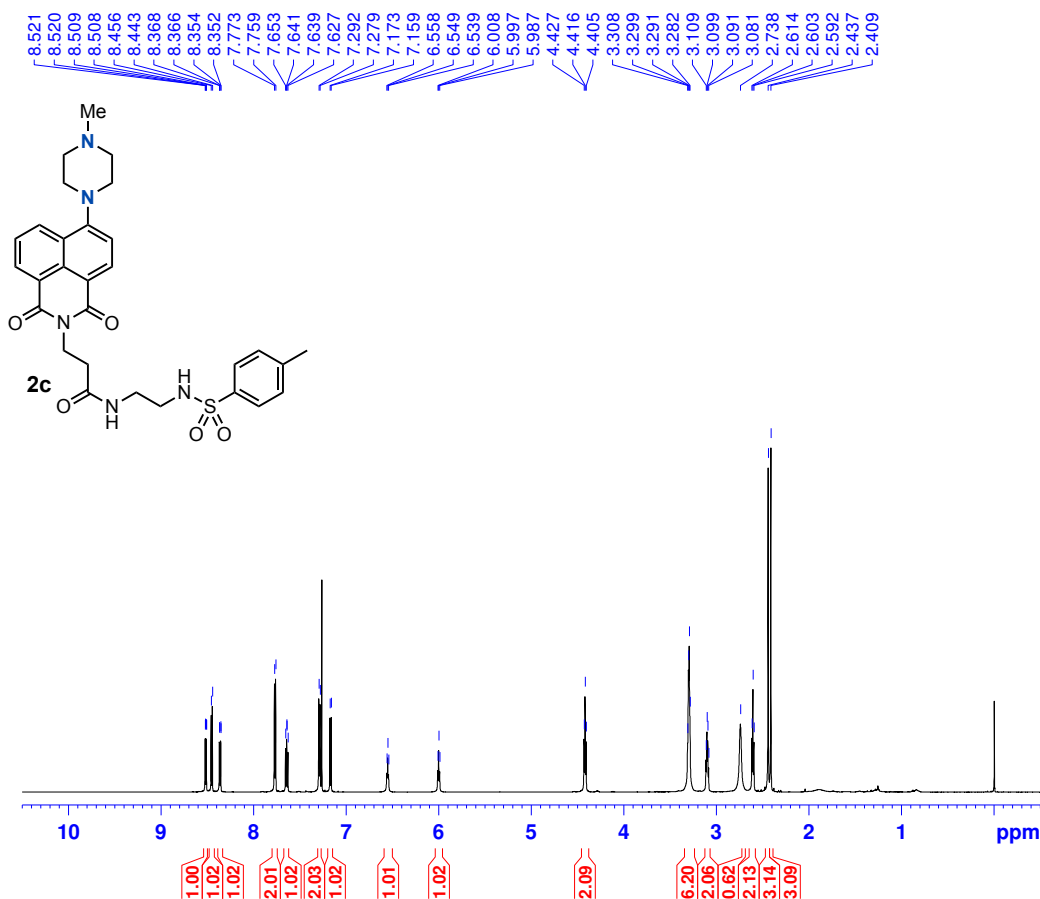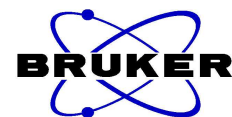

```

NAME      sk-1-1104
EXPNO     1
PROCNO    1
Date_     20210203
Time      18.01
INSTRUM   spect
PROBHD    5 mm TXI 1H/2H
PULPROG   zg30
TD         65536
SOLVENT   CDCl3
NS         4
DS         2
SWH        12376.237 Hz
FIDRES     0.188846 Hz
AQ         2.6477449 sec
RG         128
DW         40.400 usec
DE         6.50 usec
TE         298.0 K
D1         1.00000000 sec
TD0        1
  
```

```

===== CHANNEL f1 =====
NUC1      1H
P1        8.00 usec
PL1       -1.00 dB
PL1W      31.62277603 W
SFO1      600.0337054 MHz
SI        32768
SF        600.0300138 MHz
WDW       EM
SSB       0
LB        0.30 Hz
GB        0
PC        1.00
  
```

**2c: <sup>13</sup>C NMR (150 MHz, CDCl<sub>3</sub>)**

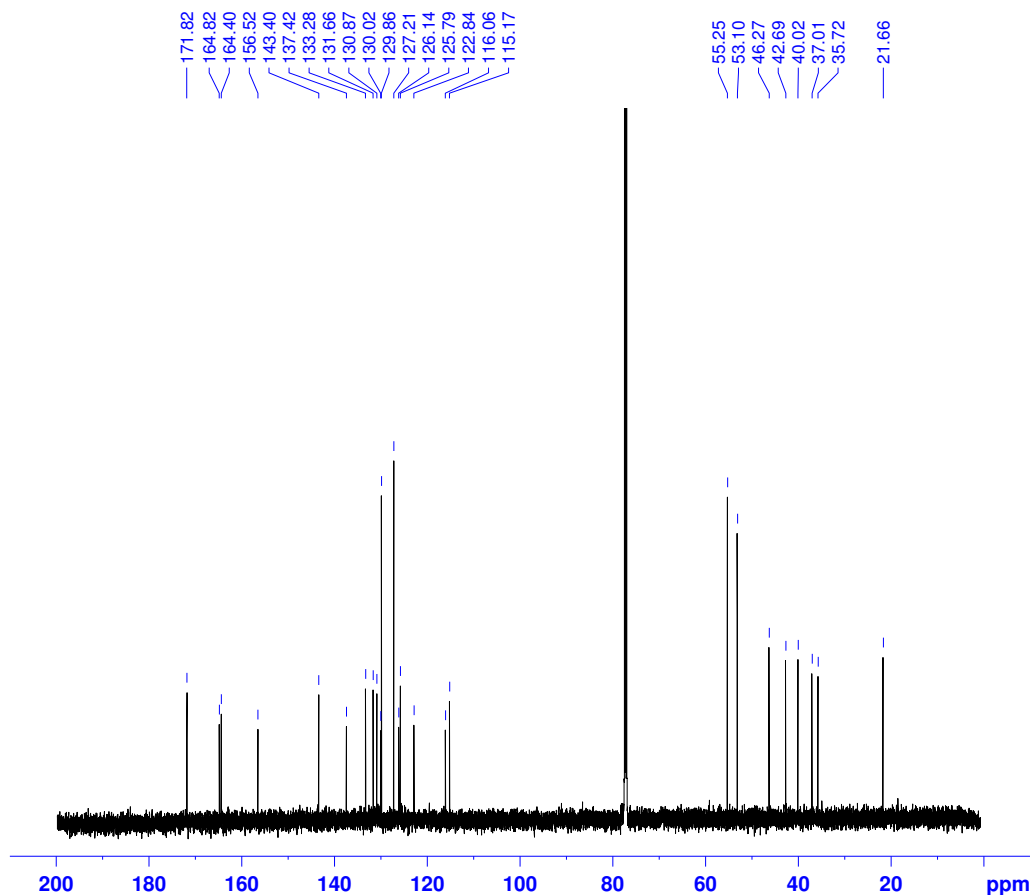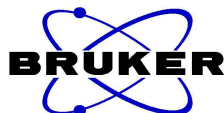

```

NAME      sk-1-1104 13C
EXPNO     1
PROCNO    1
Date_     20210203
Time      18.12
INSTRUM   spect
PROBHD    5 mm TXI 1H/2H
PULPROG   zgpg30
TD         65536
SOLVENT   CDCl3
NS         1410
DS         4
SWH        30030.029 Hz
FIDRES     0.458222 Hz
AQ         1.0912410 sec
RG         23170.5
DW         16.650 usec
DE         6.50 usec
TE         298.0 K
D1         4.00000000 sec
D11        0.03000000 sec
TD0        1
  
```

```

===== CHANNEL f1 =====
NUC1      13C
P1        15.00 usec
PL1       -3.20 dB
PL1W      262.40374756 W
SFO1      150.8927508 MHz
  
```

```

===== CHANNEL f2 =====
CPDPRG2   waltz16
NUC2      1H
PCPD2     80.00 usec
PL2       1.00 dB
PL12      19.00 dB
PL13      19.00 dB
PL2W      19.95262337 W
PL12W     0.31622776 W
PL13W     0.31622776 W
SFO2      600.0324001 MHz
SI        32768
SF        150.8776443 MHz
WDW       EM
SSB       0
LB        1.00 Hz
GB        0
PC        1.40
  
```

2d: <sup>1</sup>H NMR (600 MHz, CDCl<sub>3</sub>)

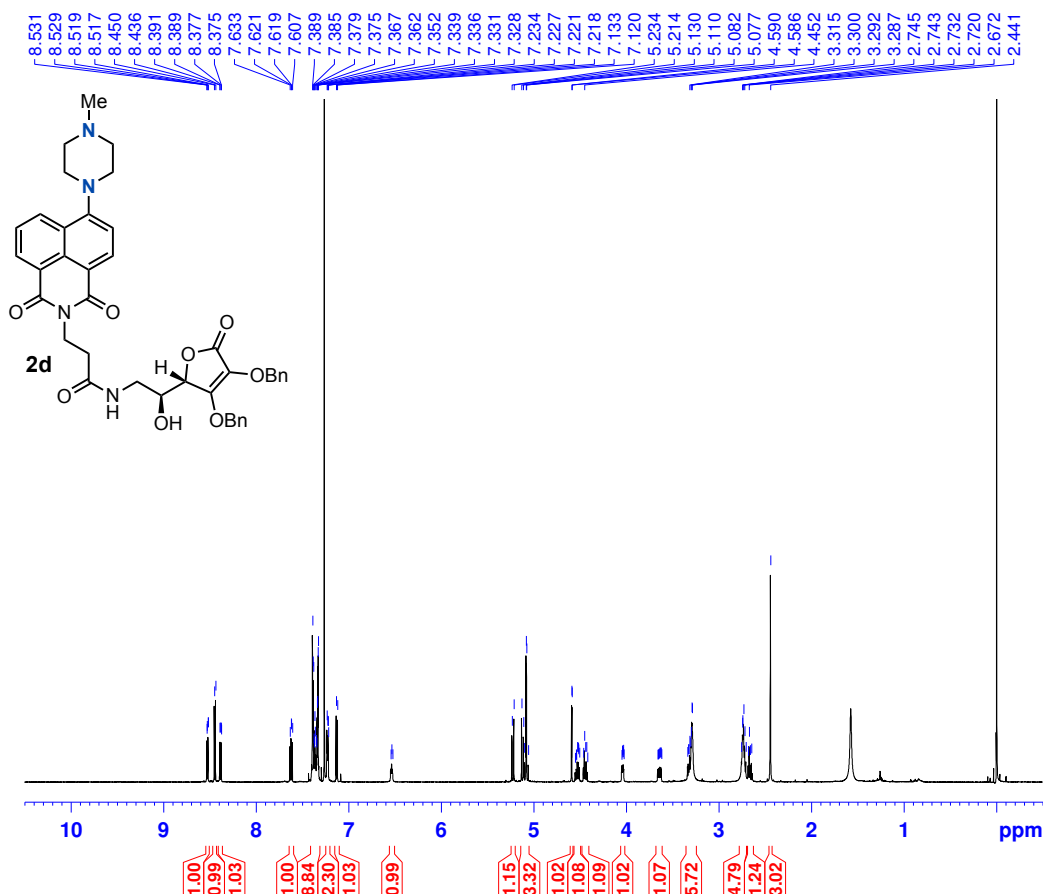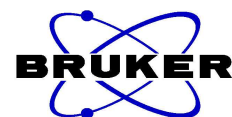

```

NAME      sk-1-1069 bottom
EXPNO     1
PROCNO    1
Date_     20210111
Time      19.25
INSTRUM   spect
PROBHD    5 mm TXI 1H/2H
PULPROG   zg30
TD         65536
SOLVENT   CDCl3
NS         16
DS         2
SWH        12376.237 Hz
FIDRES     0.188846 Hz
AQ         2.6477449 sec
RG         574.7
DW         40.400 usec
DE         6.50 usec
TE         298.0 K
D1         1.00000000 sec
TD0        1
  
```

```

===== CHANNEL f1 =====
NUC1      1H
P1         8.00 usec
PL1        -1.00 dB
PL1W      31.62277603 W
SFO1      600.0337054 MHz
SI         32768
SF         600.0300138 MHz
WDW        EM
SSB        0
LB         0.30 Hz
GB         0
PC         1.00
  
```

2d: <sup>13</sup>C NMR (150 MHz, CDCl<sub>3</sub>)

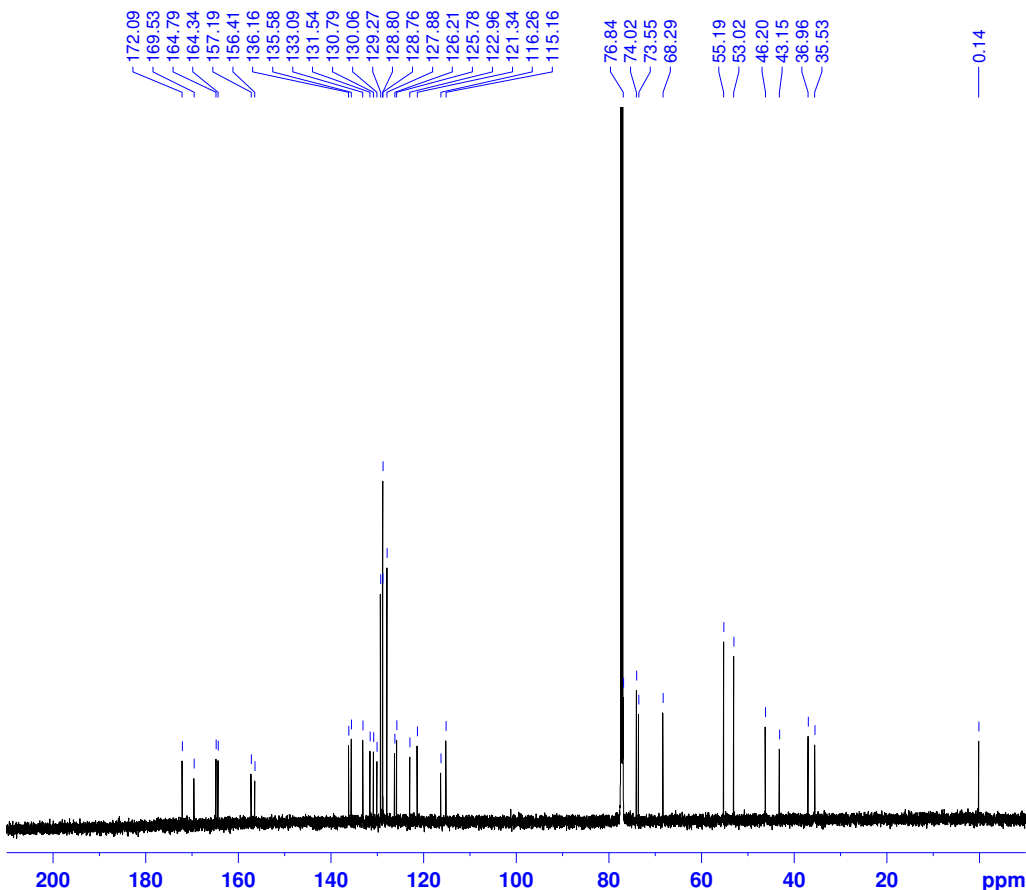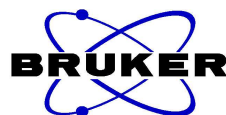

```

NAME      sk-1-1214 PTLC 13C
EXPNO     1
PROCNO    1
Date_     20210623
Time      18.09
INSTRUM   spect
PROBHD    5 mm TXI 1H/2H
PULPROG   zgpg30
TD         65536
SOLVENT   CDCl3
NS         11506
DS         4
SWH        35971.223 Hz
FIDRES     0.548877 Hz
AQ         0.9110143 sec
RG         20642.5
DW         13.900 usec
DE         6.50 usec
TE         298.0 K
D1         4.00000000 sec
D11        0.03000000 sec
TD0        1
  
```

```

===== CHANNEL f1 =====
NUC1      13C
P1         15.00 usec
PL1        -3.20 dB
PL1W      262.40374756 W
SFO1      150.8927508 MHz
  
```

```

===== CHANNEL f2 =====
CPDPRG2   waltz16
NUC2       1H
PCPD2     80.00 usec
PL2        1.00 dB
PL12       19.00 dB
PL13       19.00 dB
PL2W      19.95262337 W
PL12W     0.31622776 W
PL13W     0.31622776 W
SFO2      600.0324001 MHz
SI         32768
SF         150.8776435 MHz
WDW        EM
SSB        0
LB         1.00 Hz
GB         0
PC         1.40
  
```

## VII. References

1. S. Nakamura, J. Hidema, W. Sakamoto, H. Ishida, M. Izumi. *Plant Physiol* 2018; **177**:1007-1026.
2. W. Wen, J. L. Meinkoth, R. Y. Tsien, S. S. Taylor. *Cell* 1995; **82**:463-473.
3. K. Motohashi. *BMC Biotechnol* 2015; **15**:47.
4. C. Grefen, N. Donald, K. Hashimoto, J. Kudla, K. Schumacher, M. R. Blatt. *Plant J* 2010; **64**:355-365.
5. D. Susaki, T. Suzuki, D. Maruyama, M. Ueda, T. Higashiyama, D. Kurihara. *PLoS Biol* 2021; **19**:e3001123.
6. T. Nakagawa, S. Nakamura, K. Tanaka, M. Kawamukai, T. Suzuki, K. Nakamura, T. Kimura, S. Ishiguro. *Biosci Biotech Biochem* 2008; **72**:624-629.
7. M. Nagano, H. Ueda, Y. Fukao, M. Kawai-Yamada, I. Hara-Nishimura. *Plant Signal Behav* 2020; **15**:1790196.
8. S. J. Clough, A. F. Bent. *Plant J* 1998; **16**:735-743.
9. E. H. Harris, *The Chlamydomonas Sourcebook* 2nd edn., Academic Press, Cambridge, 2009
10. E. Koch, A. Slusarenko. *Plant Cell* 1990; **2**: 437-445.
11. M. H. Lee, N. Park, C. Yi, J. H. Han, J. H. Hong, K. P. Kim, D. H. Kang, J. L. Sessler, C. Kang, J. S. Kim, *J. Am. Chem. Soc.* 2014; **136**:14136-14142
12. K. N. Hearn, T. D. Nalder, R. P. Cox, H. D. Maynard, T. D. M. Bell, F. M. Pfeffer, T. D. Ashton. *Chem. Commun.* 2017; **53**:12298–12301.
13. H. Wang, R. Y. Xu, Y. Y. Shi, L. L. Si, P. X. Jiao, Z. B. Fan, X. Han, X. Y. Wu, X. S. Zhou, F. Yu, Y. M. Zhang, L. Zhang, L. H. Zhang, D. M. Zhou, S. L. Xiao, *Eur. J. Med. Chem.* 2016; **110**:376-388.
14. Y. H. Lee, P. Verwilt, H. S. Kim, J. Ju, J. S. Kim, K. Kim, *Chem. Commun.* 2019; **55**:12136-12139
